# Supplementary material for: Electroluminescent Warm White Light‐Emitting Diodes Based on Passivation Enabled Bright Red Bandgap Emission Carbon Quantum Dots
Source: PubMed Central journal article supplement (PMC6662328; doi:10.1002/advs.201900397), 2019-04-30
Supplement: ADVS-6-1900397-s001.pdf [file ADVS-6-1900397-s001.pdf]

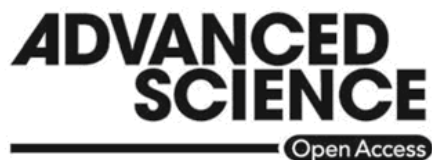

## Supporting Information

for *Adv. Sci.*, DOI: 10.1002/adv.201900397

Electroluminescent Warm White Light-Emitting Diodes Based on Passivation Enabled Bright Red Bandgap Emission Carbon Quantum Dots

*Haoran Jia, Zhibin Wang, Ting Yuan, Fanglong Yuan, Xiaohong Li, Yunchao Li, Zhan'ao Tan,\* Louzhen Fan,\* and Shihe Yang\**

## Supporting Information

## Electroluminescent Warm White Light-Emitting Diodes Based on Passivation Enabled Bright Red Bandgap Emission Carbon Quantum Dots

Haoran Jia, Zhibin Wang, Ting Yuan, Fanglong Yuan, Xiaohong Li, Yunchao Li, Zhan'ao Tan,\* Louzhen Fan,\* and Shihe Yang\*

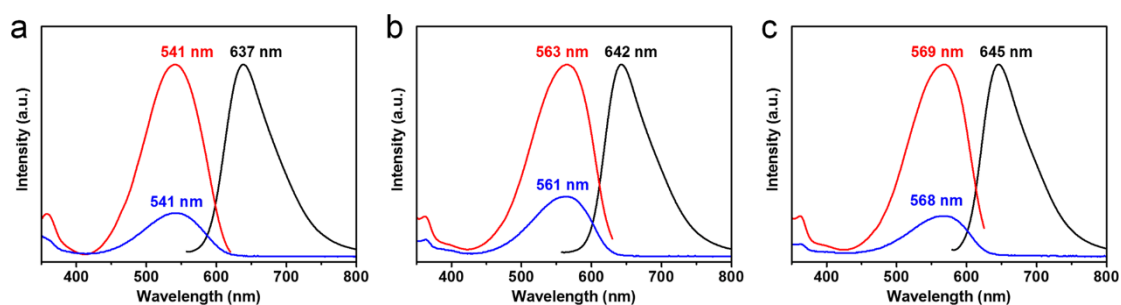

**Figure S1.** UV-vis absorption (blue line), normalized PL emission (black line, fixed excitation wavelength at 540 nm) and excitation (red line, fixed emission wavelength at 640 nm) spectra of R-EGP-CQDs-NMe<sub>2</sub> (a), -NEt<sub>2</sub> (b), and -NPr<sub>2</sub> (c) dilute ethanol solution.

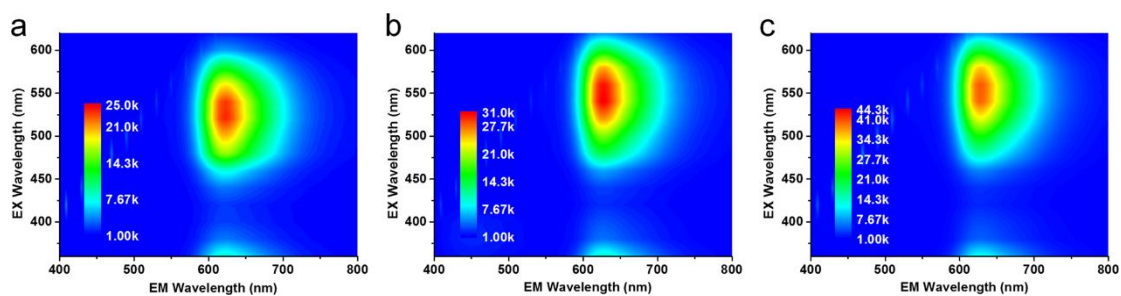

**Figure S2.** Excitation-Emission-Matrix Spectra of R-EGP-CQDs-NMe<sub>2</sub> (a), -NEt<sub>2</sub> (b), and -NPr<sub>2</sub> (c) dilute ethanol solution.

**Table S1.** Photoluminescence comparison of R-EGP-CQDs-NMe<sub>2</sub>, -NEt<sub>2</sub>, and -NPr<sub>2</sub> with other previously reported representative red-emissive CQDs.

| Emission wavelength (nm) | Quantum yields (%) | Solubility                        | Reference                                    |
|--------------------------|--------------------|-----------------------------------|----------------------------------------------|
| 637                      | 77.9               | Ethanol, DMF, chloroform, etc.    | R-EGP-CQDs-NMe <sub>2</sub>                  |
| 642                      | 85.2               |                                   | R-EGP-CQDs-NEt <sub>2</sub>                  |
| 645                      | 86.0               |                                   | R-EGP-CQDs-NPr <sub>2</sub>                  |
| 598                      | 54                 | Ethanol                           | Nat. Commun. 2018, 9, 2249.5                 |
| 628                      | 53                 | Ethanol                           | Adv. Mater. 2017, 29, 1702910.1              |
| 640                      | 48.7               | Ethanol                           | Small 2018, 14, 1800612                      |
| 630                      | 31.54              | H <sub>2</sub> O, Ethanol         | Small 2018, 14, 1703919                      |
| 604                      | 26.1               | Ethanol                           | Angew. Chem., Int. Ed. 2015, 54, 5360-5363.3 |
| 640                      | 26                 | H <sub>2</sub> O, DMSO, DMF, etc. | Adv. Mater. 2018, 30, 1705913                |
| 640                      | 22.9               | Methanol                          | Chem. Mater. 2016, 28 (23), 8659-8668.4      |
| 604                      | 12                 | Ethanol                           | Adv. Mater. 2017, 29, 1604436                |
| 610                      | 5.0                | H <sub>2</sub> O                  | Chem. Commun. 2015, 51 (13), 2544-2546.2     |
| 640                      | 2.3                | H <sub>2</sub> O                  | Adv. Mater. 2015, 27, 4169-4177.7            |

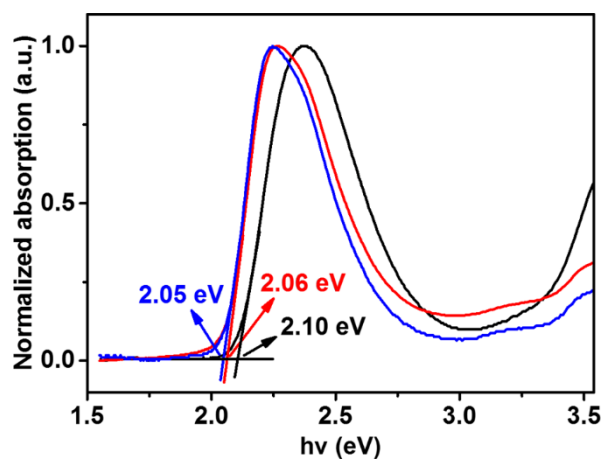

**Figure S3.** Absorption edges ( $Abs_{edge}$ ) of R-EGP-CQDs-NMe<sub>2</sub> (black), -NEt<sub>2</sub> (red), and -NPr<sub>2</sub> (blue).

**Table S2.** Energy gaps of R-EGP-CQDs-NMe<sub>2</sub>, -NEt<sub>2</sub>, and -NPr<sub>2</sub> determined from CV curves and the absorption edges in dilute acetonitrile solution.

| Sample                      | $E_{Ox}^{onset}$ (V) | $E_{Red}^{onset}$ (V) | HOMO (eV) | LUMO (eV) | $E_{g,CV}$ (eV) | $Abs_{edge}$ (nm) | $E_{g,opt}$ (eV) |
|-----------------------------|----------------------|-----------------------|-----------|-----------|-----------------|-------------------|------------------|
| R-EGP-CQDs-NMe <sub>2</sub> | 0.12                 | -1.96                 | -4.92     | -2.84     | 2.08            | 590               | 2.10             |
| R-EGP-CQDs-NEt <sub>2</sub> | 0.02                 | -1.98                 | -4.82     | -2.82     | 2.00            | 602               | 2.06             |
| R-EGP-CQDs-NPr <sub>2</sub> | -0.02                | -1.99                 | -4.78     | -2.81     | 1.97            | 605               | 2.05             |

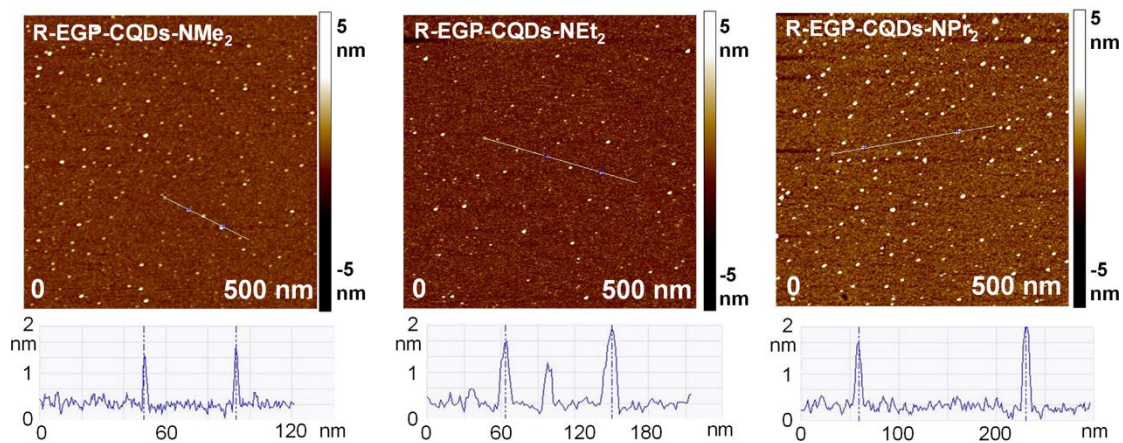

**Figure S4.** AFM images of R-EGP-CQDs-NMe<sub>2</sub>, -NEt<sub>2</sub>, and -NPr<sub>2</sub> (left to right).

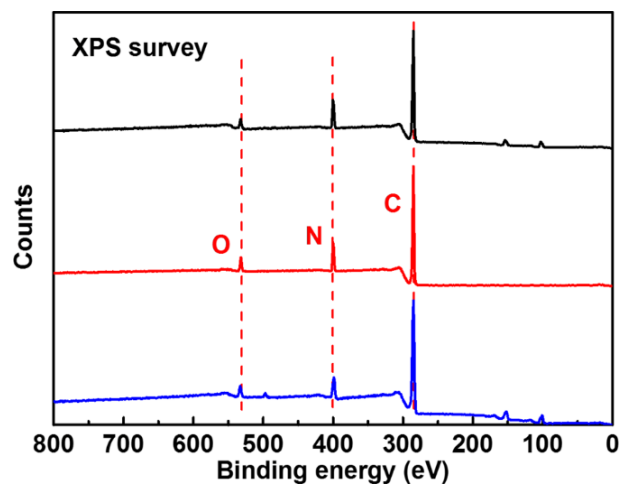

**Figure S5.** XPS survey spectra of R-EGP-CQDs-NMe<sub>2</sub> (black), -NEt<sub>2</sub> (red), and -NPr<sub>2</sub> (blue).

**Table S3.** Elemental analysis results of R-EGP-CQDs-NMe<sub>2</sub>, -NEt<sub>2</sub>, and -NPr<sub>2</sub> obtained from XPS survey spectra.

| Sample                      | Peak Binding Energy (eV) |       |       | C : N : O       |
|-----------------------------|--------------------------|-------|-------|-----------------|
|                             | C                        | N     | O     |                 |
| R-EGP-CQDs-NMe <sub>2</sub> | 284.8                    | 399.8 | 531.2 | 7.5 : 1 : 0.31  |
| R-EGP-CQDs-NEt <sub>2</sub> | 284.9                    | 400.0 | 531.1 | 9.3 : 1 : 0.42  |
| R-EGP-CQDs-NPr <sub>2</sub> | 284.8                    | 399.9 | 531.4 | 11.2 : 1 : 0.38 |

**Table S4.** Detailed elemental analysis results of R-EGP-CQDs-NMe<sub>2</sub>, -NEt<sub>2</sub>, and -NPr<sub>2</sub> obtained from high-resolution C1s and N1s spectra.

| Sample                      | C             |               |               | N             |                |               |
|-----------------------------|---------------|---------------|---------------|---------------|----------------|---------------|
|                             | C=C/C-C       | C-N           | C-O<br>/C=O   | pyridine N    | tertiary amine | graphitic N   |
| R-EGP-CQDs-NMe <sub>2</sub> | 284.5 (81.6%) | 285.4 (16.1%) | 288.0 (2.30%) | 398.4 (8.10%) | 399.9 (78.0%)  | 401.1 (13.9%) |
| R-EGP-CQDs-NEt <sub>2</sub> | 284.4 (81.5%) | 285.4 (15.8%) | 288.0 (2.70%) | 398.4 (6.30%) | 399.9 (78.1%)  | 401.0 (15.6%) |
| R-EGP-CQDs-NPr <sub>2</sub> | 284.2 (82.8%) | 285.5 (15.3%) | 287.9 (1.90%) | 398.5 (9.20%) | 399.9 (77.5%)  | 400.9 (13.3%) |

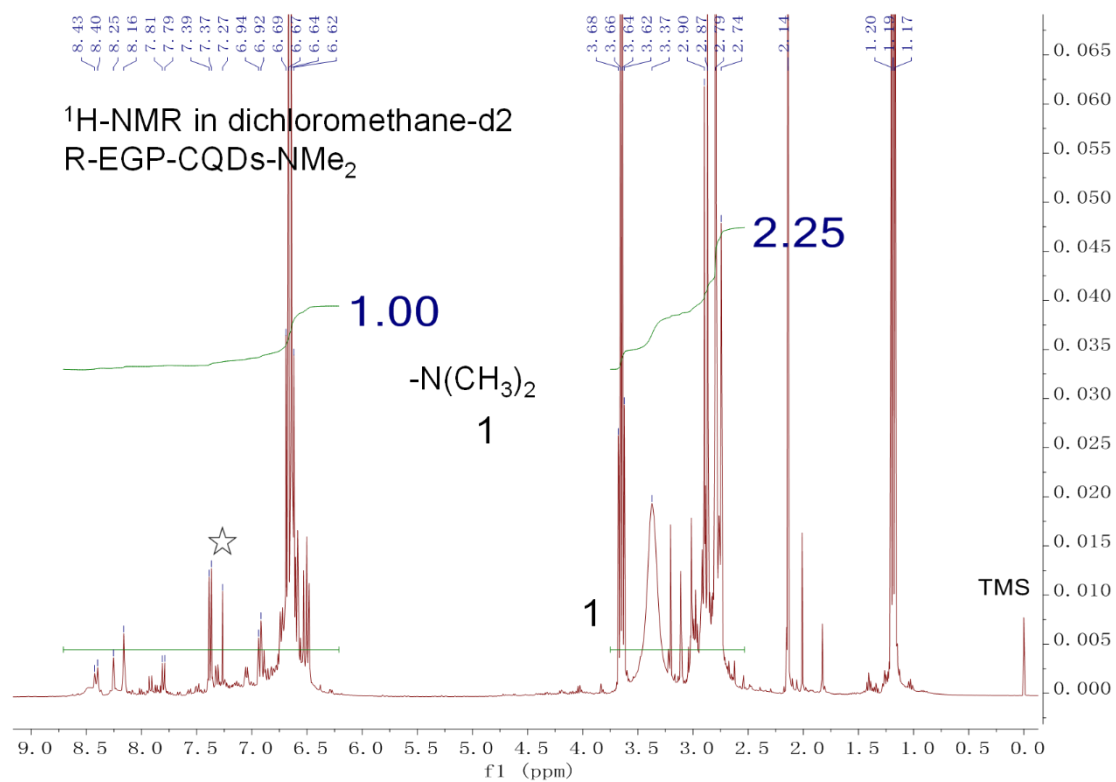

**Figure S6.** The integral processing of <sup>1</sup>H-NMR spectra of R-EGP-CQDs-NMe<sub>2</sub> in dichloromethane-d<sub>2</sub>.

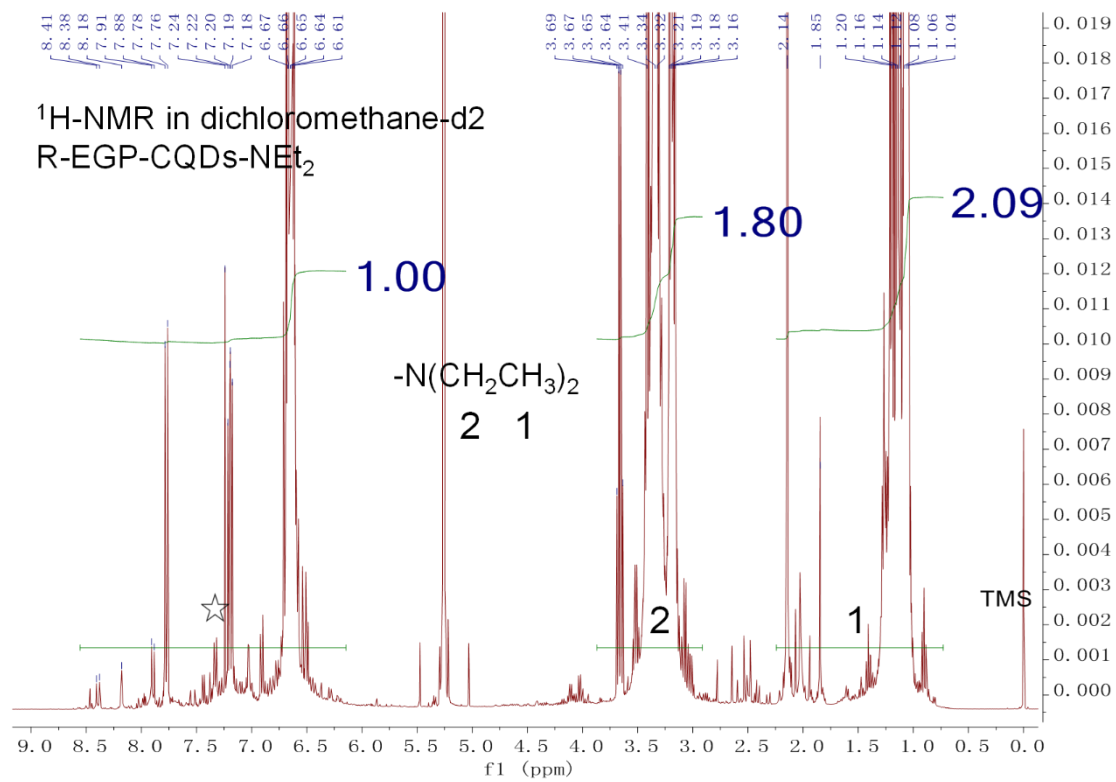

Figure S7. The integral processing of <sup>1</sup>H-NMR spectra of R-EGP-CQDs-NEt<sub>2</sub> in dichloromethane-d<sub>2</sub>.

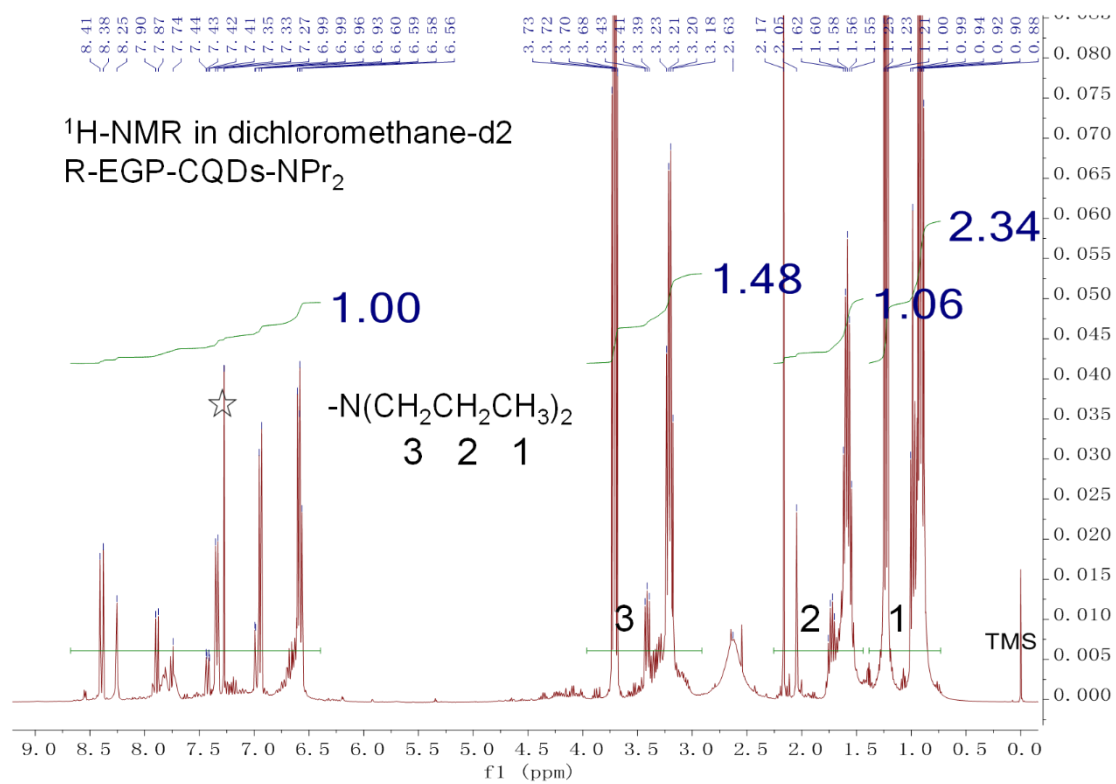

Figure S8. The integral processing of <sup>1</sup>H-NMR spectra of R-EGP-CQDs-NPr<sub>2</sub> in dichloromethane-d<sub>2</sub>.

**Table S5.** Optimized Cartesian coordinates (Å) of CQDs-0 for the first excited state.

|   |             |             |             |
|---|-------------|-------------|-------------|
| C | -0.13510500 | -3.75932200 | 0.00011100  |
| C | -1.01786600 | -2.65302300 | 0.00007800  |
| C | -0.50547100 | -1.32970100 | 0.00007300  |
| C | 0.89376200  | -1.11025800 | 0.00008800  |
| C | 1.77406800  | -2.22873900 | 0.00008200  |
| C | 1.26656500  | -3.54846800 | 0.00011100  |
| C | -1.40836800 | -0.21889000 | 0.00005200  |
| C | 1.40444800  | 0.22698500  | 0.00006700  |
| C | -2.81710500 | -0.42191300 | 0.00003600  |
| C | -3.70643700 | 0.67735500  | 0.00000800  |
| C | -3.18807400 | 1.99662600  | -0.00001400 |
| C | -1.78867800 | 2.20794500  | 0.00000700  |
| C | -0.89869900 | 1.10261500  | 0.00003800  |
| C | 0.51467100  | 1.32906600  | 0.00005800  |
| C | 1.04320600  | 2.65062200  | 0.00003300  |
| C | 2.43978700  | 2.87108800  | 0.00006600  |
| C | 3.32338300  | 1.76257700  | 0.00008500  |
| C | 2.80662400  | 0.44495500  | 0.00006900  |
| N | -4.04017700 | 3.09162400  | -0.00002300 |
| C | 2.18430400  | -4.67113100 | 0.00001700  |
| C | 3.19532900  | -2.00749700 | 0.00002200  |
| C | 3.69442800  | -0.68126200 | 0.00003000  |
| C | 5.08633800  | -0.44980300 | 0.00000600  |
| C | 6.00417100  | -1.52944200 | -0.00003400 |
| C | 5.48809000  | -2.83350200 | -0.00009300 |
| C | 4.11642600  | -3.09878600 | -0.00007100 |
| C | 3.59076400  | -4.46715700 | -0.00013300 |
| C | 4.43417200  | -5.59616600 | -0.00040700 |
| C | 3.91334400  | -6.88057100 | -0.00048100 |
| C | 2.52803800  | -7.07327700 | -0.00028100 |
| C | 1.66947500  | -5.98124200 | -0.00001200 |
| C | -3.33619300 | -1.76336600 | 0.00003200  |
| C | -5.13745200 | 0.44403800  | 0.00003600  |
| C | 0.14081200  | 3.77086000  | -0.00002200 |
| C | 2.95314000  | 4.22716100  | -0.00004000 |
| C | -1.25720000 | 3.53982700  | -0.00001900 |
| C | -2.15375700 | 4.62953900  | -0.00005600 |
| C | -1.67763600 | 5.96405400  | -0.00008400 |
| C | -0.29032400 | 6.16937500  | -0.00011500 |
| C | 0.62533500  | 5.11413400  | -0.00010500 |
| C | 2.07311100  | 5.34315200  | -0.00017500 |
| C | 2.62916000  | 6.63803300  | -0.00039600 |
| C | 4.00186900  | 6.82927900  | -0.00042000 |
| C | 4.86151700  | 5.72598700  | -0.00029000 |
| C | 4.34500300  | 4.43648600  | -0.00007200 |

# WILEY-VCH

|   |             |             |             |
|---|-------------|-------------|-------------|
| C | -5.66400700 | -0.87602500 | 0.00008300  |
| C | -7.06339500 | -1.04185800 | 0.00013500  |
| C | -7.91547000 | 0.05127700  | 0.00014300  |
| C | -7.38980300 | 1.34739900  | 0.00012100  |
| C | -6.01479800 | 1.54484100  | 0.00005000  |
| C | -2.43703300 | -2.85865100 | 0.00002800  |
| C | -2.93261700 | -4.17984300 | -0.00000600 |
| C | -4.32637700 | -4.43482500 | -0.00002700 |
| C | -5.19786800 | -3.33592200 | -0.00001900 |
| C | -4.74170200 | -2.01539500 | 0.00002600  |
| C | -5.50607900 | 2.95989000  | -0.00006400 |
| C | -3.57189800 | 4.40372200  | -0.00006500 |
| N | -4.47096900 | 5.36138100  | -0.00006300 |
| C | -4.03569200 | 6.66835900  | -0.00003300 |
| C | -5.02148100 | 7.68289200  | 0.00000600  |
| C | -4.66569600 | 9.01943600  | -0.00000100 |
| C | -3.30667000 | 9.38668100  | 0.00002000  |
| C | -2.32517100 | 8.40910700  | -0.00005600 |
| C | -2.65972100 | 7.03725900  | -0.00006300 |
| N | 4.69777600  | 1.95296200  | 0.00009100  |
| N | -0.65745000 | -5.04482600 | 0.00007800  |
| C | 0.18970200  | -6.24831600 | 0.00035000  |
| C | -2.02791900 | -5.29519600 | 0.00002000  |
| C | 5.59997400  | 0.89127400  | 0.00006900  |
| C | 5.31625500  | 3.28856400  | 0.00030100  |
| N | 6.87887700  | 1.19098000  | 0.00017200  |
| C | -3.75747200 | -6.82916100 | 0.00003400  |
| C | -4.14344600 | -8.19013600 | 0.00008100  |
| C | -5.47884400 | -8.55014800 | 0.00004500  |
| C | -6.47626700 | -7.55672100 | -0.00003900 |
| C | -6.12022400 | -6.21799900 | -0.00007000 |
| C | -4.76485900 | -5.82186700 | -0.00003200 |
| N | -2.40787900 | -6.55262900 | 0.00008000  |
| C | 7.79310100  | 0.16055600  | 0.00013500  |
| C | 9.16451400  | 0.50734800  | 0.00025700  |
| C | 10.14436400 | -0.46874800 | 0.00023000  |
| C | 9.78311200  | -1.82935800 | 0.00008900  |
| C | 8.44585000  | -2.19090400 | -0.00001800 |
| C | 7.42468200  | -1.21552700 | 0.00002000  |
| H | 6.18463000  | -3.65983700 | -0.00010900 |
| H | 5.51076300  | -5.47626500 | -0.00059700 |
| H | 4.58147100  | -7.73654700 | -0.00071500 |
| H | 2.11852500  | -8.08039900 | -0.00033700 |
| H | 0.07665400  | 7.18597800  | -0.00015200 |
| H | 1.98696500  | 7.51045000  | -0.00058300 |
| H | 4.40895200  | 7.83595700  | -0.00056400 |
| H | 5.93850600  | 5.87462200  | -0.00029900 |



|   |             |             |             |
|---|-------------|-------------|-------------|
| H | -7.49762600 | -2.03428000 | 0.00017100  |
| H | -8.99079700 | -0.09956100 | 0.00020500  |
| H | -8.05702100 | 2.20581500  | 0.00012500  |
| H | -6.26182100 | -3.52608100 | -0.00005700 |
| H | -5.88890800 | 3.50393500  | 0.87113600  |
| H | -5.88885400 | 3.50378200  | -0.87139400 |
| H | -6.06314900 | 7.37574900  | 0.00001700  |
| H | -5.43532000 | 9.78646700  | 0.00000000  |
| H | -3.02530500 | 10.43571600 | 0.00006000  |
| H | -1.28327700 | 8.71289200  | -0.00004800 |
| H | -0.08986400 | -6.85163100 | 0.87175000  |
| H | -0.09016500 | -6.85221800 | -0.87052300 |
| H | 5.97893900  | 3.34844900  | -0.87075900 |
| H | 5.97831600  | 3.34846800  | 0.87185000  |
| H | -3.35694700 | -8.93903100 | 0.00013400  |
| H | -5.75848000 | -9.60013200 | 0.00007200  |
| H | -7.52546100 | -7.83748500 | -0.00006800 |
| H | -6.90437700 | -5.46772400 | -0.00010900 |
| H | 9.41906600  | 1.56312500  | 0.00037000  |
| H | 11.19338700 | -0.18554400 | 0.00032100  |
| H | 10.55111100 | -2.59735400 | 0.00006100  |
| H | 8.18872000  | -3.24524500 | -0.00012300 |

**Table S6.** Optimized Cartesian coordinates (Å) of CQDs-NH<sub>2</sub> for the first excited state.

|   |             |             |             |
|---|-------------|-------------|-------------|
| C | -0.84202500 | 3.66405900  | 0.00165900  |
| C | 0.29656500  | 2.82571600  | 0.00293400  |
| C | 0.14430300  | 1.41438700  | 0.00368600  |
| C | -1.14975100 | 0.84110300  | 0.00315900  |
| C | -2.28915700 | 1.69286000  | 0.00159100  |
| C | -2.14160700 | 3.09849700  | 0.00177100  |
| C | 1.30329000  | 0.57516900  | 0.00501200  |
| C | -1.29720000 | -0.58217100 | 0.00305600  |
| C | 2.61052600  | 1.13598800  | 0.00613500  |
| C | 3.75428000  | 0.30554900  | 0.00749200  |
| C | 3.59412600  | -1.10276300 | 0.00538300  |
| C | 2.29895200  | -1.66965200 | 0.00382700  |
| C | 1.15270800  | -0.83227400 | 0.00415200  |
| C | -0.15351900 | -1.41624500 | 0.00347300  |
| C | -0.32155100 | -2.82888300 | 0.00186900  |
| C | -1.61262400 | -3.40394500 | 0.00187900  |
| C | -2.75224100 | -2.56112400 | 0.00363800  |
| C | -2.59549000 | -1.15598700 | 0.00312600  |
| N | 4.70416200  | -1.93938800 | 0.00403500  |
| C | -3.31622600 | 3.94196600  | -0.00037800 |
| C | -3.60599700 | 1.11331700  | 0.00021900  |

# WILEY-VCH

|   |             |             |             |
|---|-------------|-------------|-------------|
| C | -3.74496800 | -0.29754500 | 0.00177200  |
| C | -5.02886700 | -0.88287800 | 0.00256600  |
| C | -6.19504800 | -0.07736600 | 0.00161900  |
| C | -6.03413500 | 1.31590500  | -0.00089200 |
| C | -4.77822500 | 1.92931800  | -0.00239200 |
| C | -4.62552900 | 3.38952100  | -0.00445600 |
| C | -5.73153600 | 4.25453800  | -0.01383300 |
| C | -5.57615400 | 5.64368000  | -0.01402300 |
| C | -4.27045400 | 6.17554000  | -0.00842600 |
| C | -3.16564100 | 5.34144900  | -0.00256500 |
| C | 2.76717900  | 2.56627300  | 0.00544400  |
| C | 5.07198100  | 0.90088300  | 0.01045100  |
| C | 0.83897800  | -3.67956100 | -0.00033400 |
| C | -1.75617500 | -4.84280300 | -0.00265100 |
| C | 2.13024100  | -3.09439700 | 0.00080400  |
| C | 3.27943300  | -3.91358300 | -0.00176200 |
| C | 3.16469300  | -5.32622500 | -0.00604700 |
| C | 1.87750900  | -5.88368600 | -0.00788000 |
| C | 0.71811900  | -5.10274100 | -0.00463800 |
| C | -0.62292200 | -5.70035900 | -0.00721500 |
| C | -0.81939100 | -7.09061400 | -0.00936200 |
| C | -2.10010000 | -7.65073500 | -0.01224200 |
| C | -3.21364500 | -6.78588900 | -0.00715500 |
| C | -3.04348400 | -5.41203700 | -0.00132500 |
| C | 5.24843800  | 2.31099600  | 0.01043600  |
| C | 6.55072000  | 2.83616900  | 0.01031400  |
| C | 7.67607700  | 2.00700500  | 0.01362700  |
| C | 7.48357900  | 0.61026100  | 0.01356800  |
| C | 6.20875500  | 0.07073200  | 0.01156000  |
| C | 1.61461800  | 3.39194100  | 0.00316000  |
| C | 1.74952700  | 4.79663800  | 0.00111100  |
| C | 3.03013700  | 5.40352300  | 0.00148600  |
| C | 4.15635500  | 4.56774000  | 0.00458600  |
| C | 4.05998400  | 3.17324400  | 0.00624200  |
| C | 6.08495400  | -1.42911600 | 0.00767400  |
| C | 4.59153300  | -3.32713400 | -0.00006200 |
| N | 5.70817300  | -4.02035700 | -0.00224800 |
| C | 5.62580100  | -5.39554500 | -0.00660100 |
| C | 6.84069900  | -6.12058900 | -0.00909900 |
| C | 6.84339800  | -7.50384100 | -0.01356300 |
| C | 5.62606200  | -8.21054000 | -0.01563100 |
| C | 4.42485500  | -7.51993400 | -0.01314200 |
| C | 4.39225900  | -6.10850900 | -0.00867500 |
| N | -4.03172400 | -3.10387700 | 0.00484600  |
| N | -0.67253100 | 5.04365700  | -0.00047100 |
| C | -1.80490600 | 5.98444200  | 0.00098100  |
| C | 0.58555200  | 5.63974000  | -0.00110600 |

# WILEY-VCH

|   |              |             |             |
|---|--------------|-------------|-------------|
| C | -5.17697800  | -2.31242200 | 0.00626100  |
| C | -4.28092700  | -4.55471300 | 0.01360900  |
| N | -6.33546700  | -2.93285600 | 0.01015800  |
| C | 1.86018000   | 7.56938400  | -0.00375600 |
| C | 1.88059400   | 8.98400700  | -0.00655900 |
| C | 3.07706900   | 9.67820200  | -0.00689500 |
| C | 4.29758300   | 8.97715800  | -0.00442100 |
| C | 4.30032700   | 7.59152400  | -0.00173200 |
| C | 3.09427600   | 6.85754600  | -0.00128200 |
| N | 0.62767200   | 6.95335200  | -0.00326400 |
| C | -7.48522200  | -2.17393700 | 0.00880700  |
| C | -8.72038700  | -2.86379200 | 0.01298500  |
| C | -9.91981800  | -2.17474600 | 0.01219700  |
| C | -9.92328300  | -0.76722800 | 0.00713400  |
| C | -8.72478600  | -0.07184900 | 0.00327800  |
| C | -7.48600300  | -0.74917000 | 0.00429800  |
| N | -6.67868700  | 6.48910400  | 0.04372700  |
| N | 8.95891900   | 2.53881000  | 0.08044200  |
| N | -2.28112500  | -9.02766300 | -0.08208100 |
| H | -6.92139000  | 1.93324400  | -0.00012000 |
| H | -6.74098200  | 3.85897300  | -0.02019200 |
| H | -4.13364300  | 7.25489100  | -0.00855900 |
| H | 1.78699500   | -6.96099700 | -0.01252600 |
| H | 0.02789600   | -7.76685700 | -0.00957100 |
| H | -4.21666400  | -7.20714800 | -0.00775700 |
| H | 6.71327600   | 3.90803300  | 0.00869000  |
| H | 8.34987400   | -0.04778000 | 0.01590100  |
| H | 5.13422800   | 5.02821000  | 0.00601700  |
| H | 6.59510900   | -1.85528200 | 0.87911500  |
| H | 6.59881600   | -1.85153800 | -0.86347600 |
| H | 7.76783500   | -5.55476000 | -0.00739400 |
| H | 7.78560300   | -8.04521700 | -0.01528600 |
| H | 5.62587700   | -9.29671600 | -0.01934600 |
| H | 3.49690700   | -8.08293800 | -0.01495700 |
| H | -1.69495000  | 6.63764600  | 0.87429400  |
| H | -1.69202200  | 6.64329900  | -0.86750900 |
| H | -4.91720300  | -4.78801300 | -0.84763800 |
| H | -4.89223600  | -4.78221300 | 0.89475200  |
| H | 0.92647100   | 9.50333700  | -0.00835300 |
| H | 3.07480900   | 10.76486300 | -0.00905300 |
| H | 5.23843200   | 9.51987300  | -0.00465300 |
| H | 5.25250400   | 7.07009500  | 0.00000200  |
| H | -8.69332600  | -3.94965200 | 0.01675400  |
| H | -10.85973300 | -2.72003700 | 0.01538100  |
| H | -10.86395800 | -0.22416800 | 0.00628200  |
| H | -8.74905900  | 1.01342900  | -0.00078000 |
| H | -6.52847600  | 7.42193200  | -0.32228200 |

|   |             |             |             |
|---|-------------|-------------|-------------|
| H | -7.54616200 | 6.09292000  | -0.29877500 |
| H | 9.69444400  | 1.94292600  | -0.28106500 |
| H | 9.05169100  | 3.48902000  | -0.25908000 |
| H | -3.16394800 | -9.36729200 | 0.28098400  |
| H | -1.50420500 | -9.58420600 | 0.25459100  |

**Table S7.** Optimized Cartesian coordinates (Å) of CQDs-NMe<sub>2</sub> for the first excited state.

|   |             |             |             |
|---|-------------|-------------|-------------|
| C | -3.71279700 | 0.58508900  | -0.01191800 |
| C | -2.79773800 | -0.49235600 | -0.01036800 |
| C | -1.40046400 | -0.24222400 | -0.00578100 |
| C | -0.91854100 | 1.08855300  | -0.00312000 |
| C | -1.84716700 | 2.16580300  | -0.00469400 |
| C | -3.23898000 | 1.92077200  | -0.01043300 |
| C | -0.48266900 | -1.33976600 | -0.00507600 |
| C | 0.49073800  | 1.33434700  | 0.00156700  |
| C | -0.95137700 | -2.68239100 | -0.00811200 |
| C | -0.04328600 | -3.76535800 | -0.00892800 |
| C | 1.35039400  | -3.50803500 | -0.00368600 |
| C | 1.82623900  | -2.17703200 | 0.00011900  |
| C | 0.91082000  | -1.09190700 | -0.00066600 |
| C | 1.40246200  | 0.25150700  | 0.00264100  |
| C | 2.79960200  | 0.51686100  | 0.00720800  |
| C | 3.28324800  | 1.84474800  | 0.01098300  |
| C | 2.36308500  | 2.92306300  | 0.00822600  |
| C | 0.97258300  | 2.66956400  | 0.00398400  |
| N | 2.26122900  | -4.55857100 | -0.00225500 |
| C | -4.16128300 | 3.03255900  | -0.01178300 |
| C | -1.36180600 | 3.52040500  | -0.00171000 |
| C | 0.03622000  | 3.75674300  | 0.00209900  |
| C | 0.53187500  | 5.07794900  | 0.00374300  |
| C | -0.35338200 | 6.18481400  | 0.00081700  |
| C | -1.73235300 | 5.92763900  | -0.00334800 |
| C | -2.25861400 | 4.63259500  | -0.00300800 |
| C | -3.70627200 | 4.37777300  | -0.00605600 |
| C | -4.64374300 | 5.42160200  | -0.00079000 |
| C | -6.03123900 | 5.18252700  | -0.01017600 |
| C | -6.45859200 | 3.82983200  | -0.00877400 |
| C | -5.54633400 | 2.78955900  | -0.01288900 |
| C | -2.36725100 | -2.93904100 | -0.01175400 |
| C | -0.54534000 | -5.11963100 | -0.01272600 |
| C | 3.73015300  | -0.58102100 | 0.00806300  |
| C | 4.70721700  | 2.08709400  | 0.01531800  |
| C | 3.23576700  | -1.90996800 | 0.00485100  |
| C | 4.13202800  | -3.00003100 | 0.00591700  |

# WILEY-VCH

|   |             |             |             |
|---|-------------|-------------|-------------|
| C | 5.53313900  | -2.78725200 | 0.01091100  |
| C | 6.00007700  | -1.46450600 | 0.01480900  |
| C | 5.14179900  | -0.36097000 | 0.01207700  |
| C | 5.64480800  | 1.02028600  | 0.01452000  |
| C | 7.01756100  | 1.31038900  | 0.01253300  |
| C | 7.50402200  | 2.63150100  | 0.02029200  |
| C | 6.54613300  | 3.67808600  | 0.01524400  |
| C | 5.18926600  | 3.40808800  | 0.01517700  |
| C | -1.93787000 | -5.39757900 | -0.01350300 |
| C | -2.37392500 | -6.73093600 | -0.01060100 |
| C | -1.47365900 | -7.81334400 | -0.01762100 |
| C | -0.08825200 | -7.50801700 | -0.01002600 |
| C | 0.35731000  | -6.19799800 | -0.01007600 |
| C | -3.27111500 | -1.84658700 | -0.01290500 |
| C | -4.66321500 | -2.07780700 | -0.01764600 |
| C | -5.17910400 | -3.39771200 | -0.02243900 |
| C | -4.26676900 | -4.46310200 | -0.02203700 |
| C | -2.88223400 | -4.27142600 | -0.01506200 |
| C | 1.84612000  | -5.97160900 | -0.00425500 |
| C | 3.63760600  | -4.34983300 | 0.00278700  |
| N | 4.40724000  | -5.41562600 | 0.00343600  |
| C | 5.77345600  | -5.23745000 | 0.00749000  |
| C | 6.58139300  | -6.39872000 | 0.00732600  |
| C | 7.96158900  | -6.30549700 | 0.01092800  |
| C | 8.58182900  | -5.04198000 | 0.01473400  |
| C | 7.80922500  | -3.89176500 | 0.01494100  |
| C | 6.39893800  | -3.95730100 | 0.01145900  |
| N | 2.81707100  | 4.23723100  | 0.00947100  |
| N | -5.07789600 | 0.32126100  | -0.01534800 |
| C | -6.09413800 | 1.38666600  | -0.01753900 |
| C | -5.58541800 | -0.97492200 | -0.01901800 |
| C | 1.94813500  | 5.32477900  | 0.00688900  |
| C | 4.24826500  | 4.58407000  | 0.01184400  |
| N | 2.48607900  | 6.52439200  | 0.00687400  |
| C | -7.42139700 | -2.38121500 | -0.02849300 |
| C | -8.83098300 | -2.50082000 | -0.03400000 |
| C | -9.44033600 | -3.74271200 | -0.03875400 |
| C | -8.65630400 | -4.91148900 | -0.03803800 |
| C | -7.27385500 | -4.81711900 | -0.03274200 |
| C | -6.62555400 | -3.56283700 | -0.02802200 |
| N | -6.89331200 | -1.10865300 | -0.02417200 |
| C | 1.64848600  | 7.61799000  | 0.00482100  |
| C | 2.25054500  | 8.89793700  | 0.00577700  |
| C | 1.48029800  | 10.04702000 | 0.00463100  |
| C | 0.07594000  | 9.95292100  | 0.00246000  |
| C | -0.53414100 | 8.70869700  | 0.00109500  |
| C | 0.22715100  | 7.51983200  | 0.00205100  |

# WILEY-VCH

|   |              |              |             |
|---|--------------|--------------|-------------|
| N | -6.94373400  | 6.21620600   | -0.02727900 |
| N | -1.91491500  | -9.11981600  | -0.03796600 |
| N | 8.85583700   | 2.90435000   | 0.03924300  |
| C | -0.96234800  | -10.21324200 | 0.09738300  |
| C | -3.33730900  | -9.40433700  | 0.08422500  |
| C | 9.32439300   | 4.27640500   | -0.10013400 |
| C | 9.81527600   | 1.81633600   | -0.08232900 |
| C | -8.36693100  | 5.93425600   | 0.10207600  |
| C | -6.48345400  | 7.59185800   | 0.09549200  |
| H | -2.40850000  | 6.77106800   | -0.00913400 |
| H | -4.29543400  | 6.44355200   | 0.01307000  |
| H | -7.51612700  | 3.59092200   | -0.00371500 |
| H | 7.06866900   | -1.30076200  | 0.02148700  |
| H | 7.72847600   | 0.49792400   | 0.00213900  |
| H | 6.86815200   | 4.71328400   | 0.01018300  |
| H | -3.43330300  | -6.93981400  | -0.00115600 |
| H | 0.64676700   | -8.30493600  | -0.00259400 |
| H | -4.65898800  | -5.47038200  | -0.03005300 |
| H | 2.30855500   | -6.45332800  | -0.87380500 |
| H | 2.30168900   | -6.45384100  | 0.86858100  |
| H | 6.08058300   | -7.36258100  | 0.00422000  |
| H | 8.56710300   | -7.20780700  | 0.01069100  |
| H | 9.66533200   | -4.96615100  | 0.01730700  |
| H | 8.30608400   | -2.92697300  | 0.01736500  |
| H | -6.73659700  | 1.23039200   | -0.89192000 |
| H | -6.74445900  | 1.22709500   | 0.85036700  |
| H | 4.43424300   | 5.22334700   | 0.88258500  |
| H | 4.43798600   | 5.22158900   | -0.85945700 |
| H | -9.41586700  | -1.58565000  | -0.03436500 |
| H | -10.52452000 | -3.81564800  | -0.04293400 |
| H | -9.13204800  | -5.88789900  | -0.04162100 |
| H | -6.68703000  | -5.73013500  | -0.03193900 |
| H | 3.33564300   | 8.94589100   | 0.00775600  |
| H | 1.95964100   | 11.02221600  | 0.00558300  |
| H | -0.53138500  | 10.85342400  | 0.00194200  |
| H | -1.61817100  | 8.65709000   | -0.00010100 |
| H | -0.22455300  | -10.20191100 | -0.71397700 |
| H | -0.41953600  | -10.18078600 | 1.05359300  |
| H | -1.49960000  | -11.16052900 | 0.04307300  |
| H | -3.90555400  | -8.94579200  | -0.73458200 |
| H | -3.49142100  | -10.48269500 | 0.03348700  |
| H | -3.75570700  | -9.04103200  | 1.03464200  |
| H | 8.94691200   | 4.91109400   | 0.71068800  |
| H | 10.41346900  | 4.28582800   | -0.04857200 |
| H | 9.02185500   | 4.72776300   | -1.05654800 |
| H | 9.70602800   | 1.09664000   | 0.73847800  |
| H | 9.70964300   | 1.26984400   | -1.03129100 |

|   |             |            |             |
|---|-------------|------------|-------------|
| H | 10.82534500 | 2.22471700 | -0.03447500 |
| H | -8.61310700 | 5.44643400 | 1.05679400  |
| H | -8.92118400 | 6.87170500 | 0.04669500  |
| H | -8.72160600 | 5.28950100 | -0.71124300 |
| H | -5.80538600 | 7.85913900 | -0.72454300 |
| H | -7.34308000 | 8.26104500 | 0.04770000  |
| H | -5.95811400 | 7.77371200 | 1.04474800  |

**Table S8.** Optimized Cartesian coordinates (Å) of CQDs-NEt<sub>2</sub> for the first excited state.

|   |             |             |             |
|---|-------------|-------------|-------------|
| C | 1.03635507  | 3.60911461  | -0.09892357 |
| C | 1.62640363  | 2.32465127  | -0.08706734 |
| C | 0.80903754  | 1.16446340  | -0.05628513 |
| C | -0.60056606 | 1.28972437  | -0.03719046 |
| C | -1.18481822 | 2.58616417  | -0.05138656 |
| C | -0.37428712 | 3.74314897  | -0.08453755 |
| C | 1.41599034  | -0.13090081 | -0.04585770 |
| C | -1.41867352 | 0.11682977  | -0.00417293 |
| C | 2.83056904  | -0.27357384 | -0.06550870 |
| C | 3.42711303  | -1.55430120 | -0.05887273 |
| C | 2.60589530  | -2.70846334 | -0.02610885 |
| C | 1.19883480  | -2.57722399 | -0.00357191 |
| C | 0.60270467  | -1.28897509 | -0.01418521 |
| C | -0.82220765 | -1.16683717 | 0.00789235  |
| C | -1.65280625 | -2.32052096 | 0.04139620  |
| C | -3.05982744 | -2.19645289 | 0.06508405  |
| C | -3.64920179 | -0.90790763 | 0.04875789  |
| C | -2.83208073 | 0.24491588  | 0.01499260  |
| N | 3.17398830  | -3.97725175 | -0.01376683 |
| C | -0.99313828 | 5.04755752  | -0.10135991 |
| C | -2.61724630 | 2.71947844  | -0.03463276 |
| C | -3.42206429 | 1.55255865  | -0.00229849 |
| C | -4.82887595 | 1.66105090  | 0.01208064  |
| C | -5.45804205 | 2.93090995  | -0.00910979 |
| C | -4.64261969 | 4.07186639  | -0.04415934 |
| C | -3.24627630 | 4.00246520  | -0.05344698 |
| C | -2.40211873 | 5.20526425  | -0.08623682 |
| C | -2.95154310 | 6.49830868  | -0.09370475 |
| C | -2.15587749 | 7.65879704  | -0.14190932 |
| C | -0.74885927 | 7.46590838  | -0.14071385 |
| C | -0.18963134 | 6.20154698  | -0.12458867 |
| C | 3.66235596  | 0.90065996  | -0.09301640 |
| C | 4.86610637  | -1.67204550 | -0.07785410 |
| C | -1.05163105 | -3.62832296 | 0.05208228  |
| C | -3.88096662 | -3.38386116 | 0.10072305  |

# WILEY-VCH

|   |             |             |             |
|---|-------------|-------------|-------------|
| C | 0.36142506  | -3.74167755 | 0.02994434  |
| C | 0.97144339  | -5.01433300 | 0.04067181  |
| C | 0.18674799  | -6.19383920 | 0.07380440  |
| C | -1.20950793 | -6.05806248 | 0.09529791  |
| C | -1.84770737 | -4.81448675 | 0.08330630  |
| C | -3.31257436 | -4.68514154 | 0.10565091  |
| C | -4.15659681 | -5.80448148 | 0.13030762  |
| C | -5.56107968 | -5.69614990 | 0.16930114  |
| C | -6.09739670 | -4.38225321 | 0.14586620  |
| C | -5.27944164 | -3.26489563 | 0.11965927  |
| C | 5.70844655  | -0.52927079 | -0.09518034 |
| C | 7.09998697  | -0.70000353 | -0.09727307 |
| C | 7.70971405  | -1.97086810 | -0.10197686 |
| C | 6.83995843  | -3.09238748 | -0.06879937 |
| C | 5.46313855  | -2.94276795 | -0.06473420 |
| C | 3.05376599  | 2.18128118  | -0.10393620 |
| C | 3.85093201  | 3.34544576  | -0.13181989 |
| C | 5.26496303  | 3.25530970  | -0.14936359 |
| C | 5.84568205  | 1.97819001  | -0.13808924 |
| C | 5.08777516  | 0.80411120  | -0.10812142 |
| C | 4.63002675  | -4.19759432 | -0.04019996 |
| C | 2.40380153  | -5.13636395 | 0.01826882  |
| N | 3.04483597  | -6.28403947 | 0.02572733  |
| C | 2.30616492  | -7.44654928 | 0.05827325  |
| C | 3.01769356  | -8.66924025 | 0.06631055  |
| C | 2.35081785  | -9.88075780 | 0.09845906  |
| C | 0.94386277  | -9.90932004 | 0.12376628  |
| C | 0.22726121  | -8.72339561 | 0.11624507  |
| C | 0.88176632  | -7.47276954 | 0.08374554  |
| N | -5.03188414 | -0.76492699 | 0.06458521  |
| N | 1.85130689  | 4.73507360  | -0.12627674 |
| C | 1.31410785  | 6.10660369  | -0.12978405 |
| C | 3.24045929  | 4.64716338  | -0.14233136 |
| C | -5.65088170 | 0.48188958  | 0.04522427  |
| C | -5.95000771 | -1.91601545 | 0.10077205  |
| N | -6.96527781 | 0.50110665  | 0.05847376  |
| C | 5.29049103  | 5.71678845  | -0.18370424 |
| C | 5.99427672  | 6.94375157  | -0.20974254 |
| C | 7.37717970  | 6.97098986  | -0.22961547 |
| C | 8.10529362  | 5.76650338  | -0.22370333 |
| C | 7.43597357  | 4.55351977  | -0.19798363 |
| C | 6.02538991  | 4.49612617  | -0.17753379 |
| N | 3.91406605  | 5.77576684  | -0.16553302 |
| C | -7.60259233 | 1.72246641  | 0.03955843  |
| C | -9.01719292 | 1.71822343  | 0.05488837  |
| C | -9.73302479 | 2.90180464  | 0.03871150  |
| C | -9.05429470 | 4.13439581  | 0.00708652  |



# WILEY-VCH

|   |              |              |             |
|---|--------------|--------------|-------------|
| C | -7.66900592  | 4.16142151   | -0.00866410 |
| C | -6.91314840  | 2.96894419   | 0.00630903  |
| N | -2.71216994  | 8.93236575   | -0.21505746 |
| N | 9.09014492   | -2.12589196  | -0.15780216 |
| N | -6.38460543  | -6.81496623  | 0.24974781  |
| C | 9.64062743   | -3.48724344  | -0.04504133 |
| C | 9.95764138   | -0.99068783  | 0.17299550  |
| C | -7.84155390  | -6.60737936  | 0.19930016  |
| C | -5.85936166  | -8.12619416  | -0.14640732 |
| C | -1.91041978  | 10.09453763  | 0.18613147  |
| C | -4.17773979  | 9.04657988   | -0.15242476 |
| C | 11.13655325  | -3.60997967  | -0.33189115 |
| C | 10.03492004  | -0.66509293  | 1.67057653  |
| C | -5.70009164  | -8.31378491  | -1.66079780 |
| C | -8.68333049  | -7.83595679  | 0.54318033  |
| C | -4.73573970  | 10.43009030  | -0.48389186 |
| C | -1.70963042  | 10.23374315  | 1.70083069  |
| H | -5.12219288  | 5.04018643   | -0.07044262 |
| H | -4.02362505  | 6.60275372   | -0.04466755 |
| H | -0.07825929  | 8.31664146   | -0.15819317 |
| H | -1.80834242  | -6.95746186  | 0.12493875  |
| H | -3.71126182  | -6.78712601  | 0.12429675  |
| H | -7.16850505  | -4.22429622  | 0.13386039  |
| H | 7.72697925   | 0.17785170   | -0.09604698 |
| H | 7.23911333   | -4.09830818  | -0.03475140 |
| H | 6.92425896   | 1.90904252   | -0.15664732 |
| H | 4.88912187   | -4.81196882  | 0.82983335  |
| H | 4.85566260   | -4.82273446  | -0.91225986 |
| H | 4.10259577   | -8.62248882  | 0.04657820  |
| H | 2.91320760   | -10.81053630 | 0.10426418  |
| H | 0.41783036   | -10.85927490 | 0.14911659  |
| H | -0.85704504  | -8.76703564  | 0.13557793  |
| H | 1.73334084   | 6.63006450   | 0.73759883  |
| H | 1.72678123   | 6.62177648   | -1.00461033 |
| H | -6.61990261  | -1.83476371  | -0.76320354 |
| H | -6.59556680  | -1.79857228  | 0.97895235  |
| H | 5.41208914   | 7.86059973   | -0.21388466 |
| H | 7.90153165   | 7.92254739   | -0.24980089 |
| H | 9.19118232   | 5.78527510   | -0.23914135 |
| H | 8.01578440   | 3.63599211   | -0.19326274 |
| H | -9.51923036  | 0.75543551   | 0.08003507  |
| H | -10.81938076 | 2.87996656   | 0.05094256  |
| H | -9.61387921  | 5.06524507   | -0.00486279 |
| H | -7.16484632  | 5.12233932   | -0.03178537 |
| H | 9.42615078   | -3.91343307  | 0.94866094  |
| H | 9.11688594   | -4.11477883  | -0.77330624 |
| H | 10.95517484  | -1.21022518  | -0.20855531 |

|   |             |             |             |
|---|-------------|-------------|-------------|
| H | 9.62311780  | -0.11549572 | -0.39089421 |
| H | -8.08645941 | -5.83049176 | 0.93016647  |
| H | -8.14916284 | -6.22091376 | -0.78637248 |
| H | -4.90508960 | -8.29372766 | 0.36025517  |
| H | -6.53001730 | -8.88798662 | 0.25214354  |
| H | -0.94403933 | 10.05260001 | -0.32291520 |
| H | -2.39949435 | 10.98712439 | -0.20541703 |
| H | -4.58959976 | 8.34315673  | -0.88340970 |
| H | -4.55469911 | 8.72996710  | 0.83440488  |
| H | 11.39576247 | -4.67388224 | -0.33938459 |
| H | 11.39473513 | -3.19484731 | -1.31200042 |
| H | 11.75841769 | -3.12749204 | 0.42817324  |
| H | 10.69350224 | 0.19503180  | 1.83703841  |
| H | 9.04739444  | -0.42244976 | 2.07667033  |
| H | 10.43571831 | -1.51355277 | 2.23650235  |
| H | -5.30028976 | -9.31078501 | -1.87851494 |
| H | -6.66415495 | -8.21606561 | -2.17263951 |
| H | -5.01438512 | -7.57160223 | -2.08285795 |
| H | -9.73121670 | -7.52473109 | 0.60808297  |
| H | -8.62287723 | -8.62236562 | -0.21522694 |
| H | -8.39784297 | -8.25999912 | 1.51189401  |
| H | -5.82665565 | 10.35412680 | -0.54086807 |
| H | -4.50012362 | 11.18000145 | 0.27722625  |
| H | -4.37262867 | 10.78869425 | -1.45311740 |
| H | -1.10622774 | 11.12146212 | 1.92256131  |
| H | -2.67054585 | 10.33932285 | 2.21692985  |
| H | -1.19546952 | 9.35992155  | 2.11520040  |

**Table S9.** Optimized Cartesian coordinates (Å) of CQDs-NPr<sub>2</sub> for the first excited state.

|   |             |             |             |
|---|-------------|-------------|-------------|
| C | 3.73302500  | 0.26988700  | -0.01653000 |
| C | 2.59777800  | 1.11192000  | -0.04264200 |
| C | 1.29346900  | 0.55237900  | -0.06218100 |
| C | 1.12522800  | -0.85283700 | -0.05589000 |
| C | 2.27328700  | -1.69194800 | -0.02918600 |
| C | 3.57321800  | -1.13802900 | -0.01364900 |
| C | 0.15115800  | 1.41359800  | -0.09120600 |
| C | -0.19152800 | -1.41144000 | -0.06912700 |
| C | 0.30319600  | 2.82770900  | -0.09873000 |
| C | -0.82794900 | 3.67483000  | -0.13253700 |
| C | -2.12739600 | 3.10924700  | -0.15338500 |
| C | -2.28855400 | 1.70434300  | -0.13551800 |
| C | -1.15060600 | 0.85656400  | -0.10544100 |
| C | -1.32481300 | -0.56336200 | -0.09390800 |
| C | -2.62531200 | -1.13902300 | -0.10275700 |

# WILEY-VCH

|   |             |             |             |
|---|-------------|-------------|-------------|
| C | -2.79448200 | -2.54149800 | -0.09399600 |
| C | -1.65485000 | -3.38334800 | -0.07166000 |
| C | -0.35788300 | -2.82093700 | -0.06066600 |
| N | -3.25250800 | 3.92324200  | -0.18572300 |
| C | 4.72204300  | -2.01230400 | 0.01792500  |
| C | 2.10779700  | -3.12102200 | -0.02101200 |
| C | 0.79988400  | -3.66781600 | -0.03765400 |
| C | 0.61587800  | -5.06684500 | -0.03352000 |
| C | 1.72853100  | -5.94453300 | -0.01900700 |
| C | 3.01349600  | -5.38186000 | -0.00504500 |
| C | 3.23320800  | -4.00132200 | 0.00127800  |
| C | 4.58457100  | -3.42412000 | 0.02637600  |
| C | 5.73498100  | -4.22885700 | 0.07558500  |
| C | 7.03243300  | -3.68702900 | 0.08936100  |
| C | 7.13685200  | -2.27172200 | 0.08012600  |
| C | 6.01616700  | -1.46229900 | 0.04884800  |
| C | 1.62480600  | 3.39627700  | -0.07006600 |
| C | -0.64593700 | 5.11131900  | -0.13055300 |
| C | -3.78114400 | -0.28210700 | -0.12550100 |
| C | -4.12561200 | -3.10114600 | -0.09835500 |
| C | -3.60094800 | 1.12380100  | -0.14472200 |
| C | -4.72121100 | 1.98132100  | -0.17566700 |
| C | -6.03721100 | 1.45597000  | -0.19082700 |
| C | -6.19185500 | 0.06177400  | -0.16854500 |
| C | -5.10613000 | -0.81754500 | -0.13159200 |
| C | -5.28177500 | -2.27733700 | -0.10538800 |
| C | -6.55132500 | -2.87173300 | -0.08565900 |
| C | -6.73613700 | -4.26912800 | -0.08344200 |
| C | -5.55993700 | -5.06442400 | -0.06532800 |
| C | -4.29801300 | -4.49429800 | -0.07850800 |
| C | 0.65119100  | 5.68889800  | -0.08733500 |
| C | 0.76530800  | 7.09109400  | -0.08793200 |
| C | -0.35111500 | 7.92329300  | -0.10629200 |
| C | -1.62736500 | 7.33124200  | -0.14518800 |
| C | -1.77338800 | 5.95123900  | -0.16973700 |
| C | 2.75216300  | 2.53739600  | -0.04293300 |
| C | 4.05508900  | 3.07909000  | -0.01508600 |
| C | 4.25879300  | 4.48166800  | -0.00950400 |
| C | 3.12895600  | 5.31311100  | -0.03057500 |
| C | 1.82548000  | 4.80988100  | -0.06265900 |
| C | -3.16875500 | 5.39195300  | -0.24600600 |
| C | -4.54597000 | 3.40734700  | -0.20307200 |
| N | -5.53578000 | 4.27036700  | -0.24848000 |
| C | -6.82590500 | 3.78706300  | -0.26080300 |
| C | -7.87501900 | 4.73494800  | -0.30477800 |
| C | -9.19809900 | 4.33188600  | -0.31826500 |
| C | -9.51648600 | 2.96115600  | -0.28790300 |

# WILEY-VCH

|   |              |              |             |
|---|--------------|--------------|-------------|
| C | -8.50428700  | 2.01591900   | -0.24518600 |
| C | -7.14531100  | 2.39879200   | -0.23154600 |
| N | -1.80029800  | -4.76517200  | -0.06028700 |
| N | 5.00209200   | 0.83592400   | 0.00722000  |
| C | 6.23346100   | 0.02804000   | 0.02943400  |
| C | 5.20265000   | 2.21356900   | 0.00880800  |
| C | -0.70760000  | -5.62799000  | -0.04599700 |
| C | -3.11586600  | -5.42764300  | -0.06499200 |
| N | -0.96055200  | -6.91770100  | -0.04391400 |
| C | 6.67221800   | 3.99874600   | 0.03665100  |
| C | 8.01802400   | 4.43414800   | 0.06174300  |
| C | 8.32988400   | 5.78172900   | 0.06748100  |
| C | 7.30158100   | 6.74276200   | 0.04833400  |
| C | 5.97666000   | 6.33831600   | 0.02404800  |
| C | 5.62953100   | 4.96965600   | 0.01765900  |
| N | 6.44570200   | 2.63986500   | 0.03187800  |
| C | 0.10296300   | -7.79343600  | -0.03069600 |
| C | -0.19360800  | -9.17668400  | -0.02927100 |
| C | 0.81671800   | -10.12133700 | -0.01594800 |
| C | 2.16319900   | -9.71177800  | -0.00325800 |
| C | 2.47602500   | -8.36191100  | -0.00422700 |
| C | 1.46518000   | -7.37619700  | -0.01820600 |
| N | 8.17981400   | -4.47266600  | 0.10170300  |
| N | -0.16292300  | 9.34317800   | -0.08901600 |
| N | -7.99947100  | -4.84675300  | -0.11831900 |
| C | -1.07670100  | 10.09437400  | -0.97080800 |
| C | -0.10866300  | 9.91307500   | 1.27567200  |
| C | -8.09625700  | -6.31171200  | -0.00541300 |
| C | -9.17695500  | -4.03714100  | 0.20674900  |
| C | 9.40002100   | -3.94451500  | 0.73075600  |
| C | 8.07565900   | -5.93020500  | -0.01208300 |
| C | -0.42594000  | 11.36043000  | -1.54228900 |
| C | 1.15254100   | 9.56076900   | 2.06834500  |
| C | -9.36326900  | -3.74645500  | 1.70552900  |
| C | -9.48288100  | -6.90814700  | -0.26527700 |
| C | 9.27973400   | -6.59961200  | -0.68852200 |
| C | 10.44815000  | -3.38372300  | -0.24424600 |
| C | 1.17849800   | 10.25518800  | 3.43478200  |
| C | -1.37459800  | 12.12944300  | -2.46809800 |
| C | -10.60498600 | -2.89148400  | 1.97642300  |
| C | -9.42030300  | -8.44046300  | -0.27621800 |
| C | 11.67669600  | -2.84029700  | 0.49259500  |
| C | 9.06845400   | -8.11180600  | -0.82456700 |
| H | 3.86274200   | -6.05056800  | -0.00562800 |
| H | 5.61662000   | -5.29943300  | 0.14241400  |
| H | 8.11354500   | -1.80063900  | 0.07293300  |
| H | -7.19511400  | -0.33991200  | -0.19001300 |

# WILEY-VCH

|   |              |              |             |
|---|--------------|--------------|-------------|
| H | -7.41981100  | -2.23216500  | -0.06926800 |
| H | -5.62601700  | -6.14456100  | -0.02818600 |
| H | 1.73621500   | 7.56978900   | -0.09480000 |
| H | -2.51368200  | 7.96002100   | -0.15860800 |
| H | 3.27923700   | 6.38355400   | -0.02093100 |
| H | -3.65952800  | 5.71720900   | -1.17183700 |
| H | -3.78662000  | 5.79297400   | 0.56446200  |
| H | -7.60530900  | 5.78675300   | -0.32666600 |
| H | -9.99173200  | 5.07334400   | -0.35166100 |
| H | -10.55465300 | 2.64199100   | -0.29748700 |
| H | -8.77132000  | 0.96415700   | -0.22080800 |
| H | 6.83571200   | 0.31505300   | -0.84070400 |
| H | 6.81932300   | 0.33981100   | 0.90155000  |
| H | -3.15891900  | -6.08721900  | 0.80958600  |
| H | -3.14738000  | -6.09659900  | -0.93289300 |
| H | 8.79480000   | 3.67527000   | 0.07615600  |
| H | 9.36908100   | 6.09874900   | 0.08658800  |
| H | 7.54430000   | 7.80143600   | 0.05254100  |
| H | 5.19835900   | 7.09462200   | 0.00911300  |
| H | -1.23943200  | -9.46946200  | -0.03890900 |
| H | 0.57083400   | -11.17979500 | -0.01504800 |
| H | 2.95838900   | -10.45156400 | 0.00763200  |
| H | 3.52045900   | -8.06680600  | 0.00700600  |
| H | -1.35041700  | 9.43994800   | -1.80528000 |
| H | -2.01737700  | 10.36187100  | -0.45617800 |
| H | -0.15303200  | 11.00163000  | 1.16676900  |
| H | -1.00397200  | 9.61910200   | 1.85473400  |
| H | -7.41596900  | -6.74657600  | -0.74621300 |
| H | -7.74150200  | -6.65017400  | 0.98276600  |
| H | -9.12980700  | -3.09911400  | -0.35559000 |
| H | -10.05838500 | -4.55379500  | -0.17662700 |
| H | 9.11945300   | -3.16856900  | 1.45273600  |
| H | 9.85167100   | -4.75166900  | 1.32051600  |
| H | 7.91007200   | -6.39088800  | 0.97762700  |
| H | 7.19843300   | -6.15927700  | -0.62130800 |
| H | -0.10121100  | 12.02014000  | -0.72753300 |
| H | 0.48118400   | 11.06833500  | -2.08613700 |
| H | 1.21564200   | 8.47559000   | 2.21092200  |
| H | 2.03249700   | 9.85285100   | 1.48058600  |
| H | -9.44086000  | -4.69871300  | 2.24682100  |
| H | -8.46916500  | -3.24106300  | 2.09127500  |
| H | -10.19596000 | -6.58716800  | 0.50289200  |
| H | -9.86458000  | -6.54972800  | -1.22968900 |
| H | 9.42576000   | -6.15118900  | -1.67913500 |
| H | 10.19725400  | -6.41572600  | -0.11785000 |
| H | 10.75005500  | -4.17074900  | -0.94470100 |
| H | 9.99573600   | -2.58993200  | -0.85172700 |

|   |              |             |             |
|---|--------------|-------------|-------------|
| H | 2.08372700   | 9.99125500  | 3.99245500  |
| H | 1.15813200   | 11.34674500 | 3.32815300  |
| H | 0.31471400   | 9.96474300  | 4.04532900  |
| H | -0.89052100  | 13.02525900 | -2.87219200 |
| H | -1.69216600  | 11.51014600 | -3.31609100 |
| H | -2.27772000  | 12.45030900 | -1.93462400 |
| H | -10.72407000 | -2.69606100 | 3.04766300  |
| H | -10.53932300 | -1.92267100 | 1.46583400  |
| H | -11.51622600 | -3.39090600 | 1.62489900  |
| H | -10.41441400 | -8.86744000 | -0.44499000 |
| H | -8.75805800  | -8.80694500 | -1.06948700 |
| H | -9.04687400  | -8.82983200 | 0.67846700  |
| H | 12.41655800  | -2.44568900 | -0.21206700 |
| H | 11.40279800  | -2.02939000 | 1.17878400  |
| H | 12.16433000  | -3.62511800 | 1.08405200  |
| H | 9.93247700   | -8.58516600 | -1.30285200 |
| H | 8.92939800   | -8.58317300 | 0.15591100  |
| H | 8.18375300   | -8.33769800 | -1.43204100 |

**Table S10.** The calculated absorption wavelength ( $\lambda_{\text{Abs}}$ , nm), absorption oscillator strength ( $f_{\text{Abs}}$ ), PL emission wavelength ( $\lambda_{\text{Em}}$ , nm), emission oscillator strength ( $f_{\text{Em}}$ ), HOMO (eV), LUMO (eV) and bandgap energies (eV) of CQDs-0, -NH<sub>2</sub>, -NMe<sub>2</sub>, -NEt<sub>2</sub>, and -NPr<sub>2</sub>.

|                        | CQDs-0 | CQDs-NH <sub>2</sub> | CQDs-NMe <sub>2</sub> | CQDs-NEt <sub>2</sub> | CQDs-NPr <sub>2</sub> |
|------------------------|--------|----------------------|-----------------------|-----------------------|-----------------------|
| $\lambda_{\text{Abs}}$ | 482    | 498                  | 518                   | 530                   | 534                   |
| $f_{\text{Abs}}$       | 0.110  | 0.272                | 0.827                 | 0.858                 | 0.869                 |
| $\lambda_{\text{Em}}$  | 559    | 583                  | 614                   | 620                   | 623                   |
| $f_{\text{Em}}$        | 0.245  | 0.446                | 1.165                 | 1.262                 | 1.271                 |
| HOMO                   | -5.30  | -5.15                | -5.02                 | -4.95                 | -4.90                 |
| LUMO                   | -2.42  | -2.38                | -2.35                 | -2.31                 | -2.30                 |
| GAP                    | 2.88   | 2.77                 | 2.67                  | 2.64                  | 2.60                  |

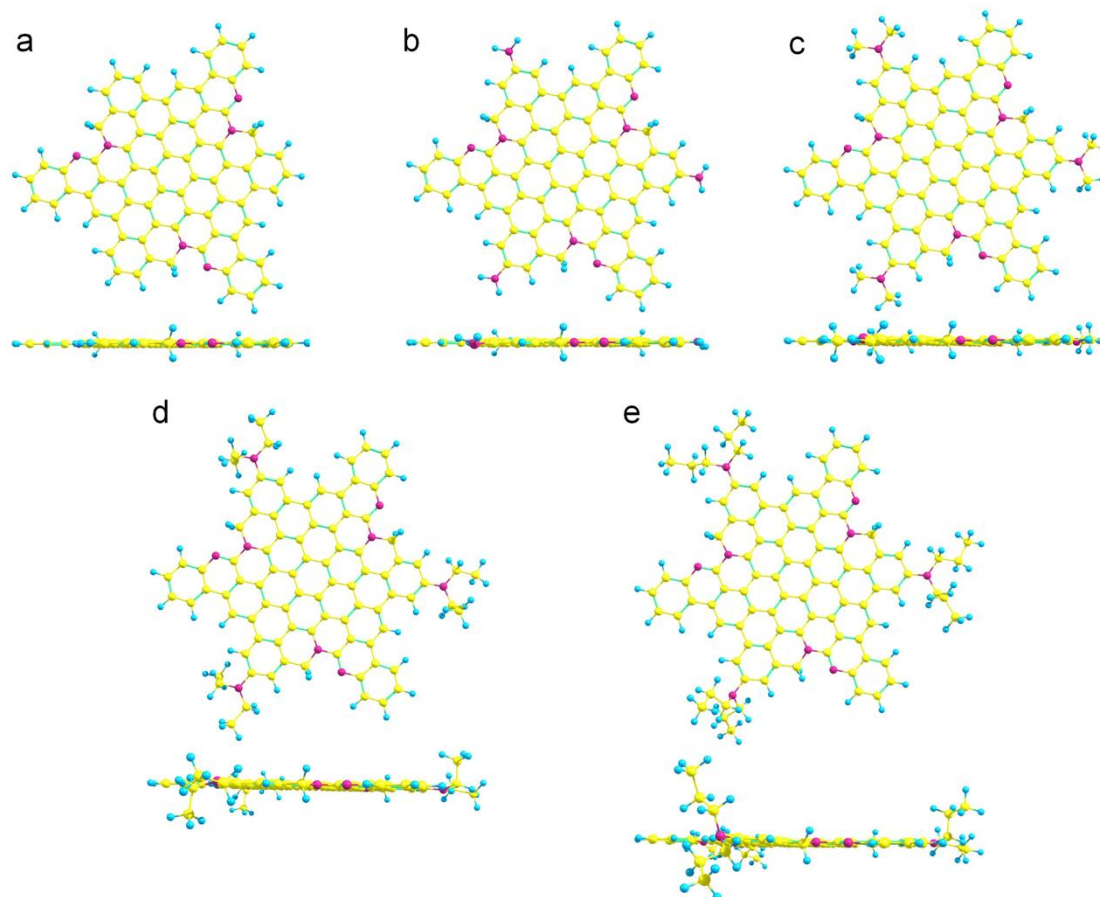

**Figure S9.** Optimized structures of CQDs-0 (a), -NH<sub>2</sub> (b), -NMe<sub>2</sub> (c), -NEt<sub>2</sub> (d), and -NPr<sub>2</sub> (e). Top view (top), side view (bottom).

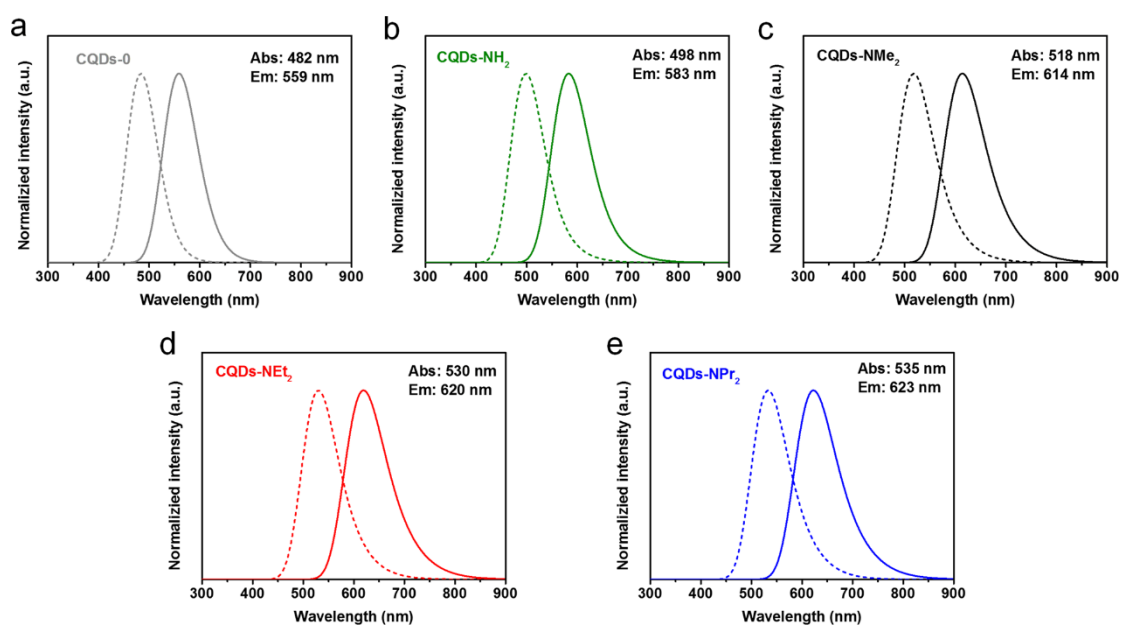

**Figure S10.** The calculated UV-vis absorption (dashed line) and PL emission spectra (solid line) of CQDs-0 (a), -NH<sub>2</sub> (b), -NMe<sub>2</sub> (c), -NEt<sub>2</sub> (d), and -NPr<sub>2</sub> (e).

Control experiment:

In order to further affirm the effect of passivating electron-donating group (EDG) on the optical properties of CQDs, other two CQDs (namely CQDs-OMe and -Mor) passivated by relatively weak EDG, e.g., methoxy group (-OMe) and morpholinyl group (-Mor) have been synthesized by selecting 4-methoxy-aniline and 4-morpholinyl-aniline as precursors. The synthesis and purification process remain the same as those of R-EPG-CQDs-NMe<sub>2</sub>, -NEt<sub>2</sub>, and -NPr<sub>2</sub>. In comparison with R-EPG-CQDs-NMe<sub>2</sub>, -NEt<sub>2</sub>, and -NPr<sub>2</sub>, CQDs-OMe and -Mor exhibit lower QY (10 and 34%) and shorter PL emission (597 and 631 nm) in dilute ethanol solution (Figure S11). As shown in the statistical comparison of the optical properties among these CQDs (Figure S12), increasing the electron-donating ability of passivating group on CQDs is beneficial to acquire higher QY and longer PL emission, which agrees well with the theoretical investigation.

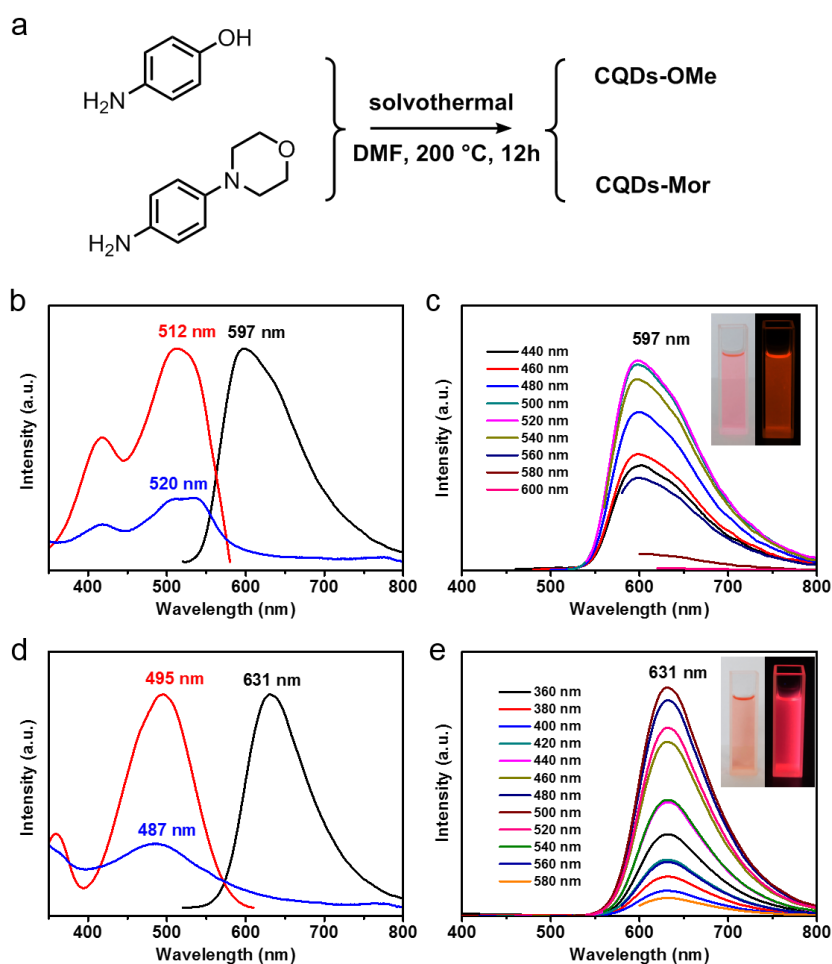

**Figure S11.** The synthesis (a) of CQDs-OMe and -Mor. UV-vis absorption (blue line), normalized PL emission (black line, fixed excitation wavelength at 500 nm) and excitation (red line, fixed emission wavelength at 600 and 630 nm, respectively) spectra of CQDs-OMe (b) and -Mor (d) dilute ethanol solution. PL emission spectra under different excitation wavelength and photographs under daylight (left inset) and 365 nm UV light (right inset) of CQDs-OMe (c) and -Mor (e) dilute ethanol solution.



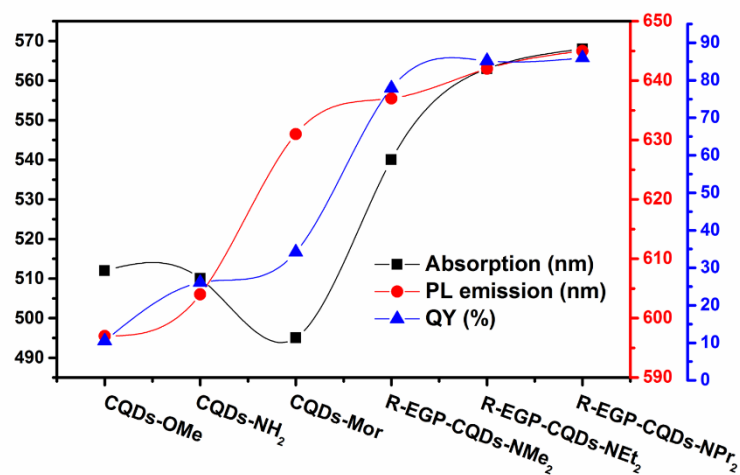

**Figure S12.** The statistical comparison of the optical properties among CQDs-OMe, CQDs-NH<sub>2</sub> (Ref. 24), CQDs-Mor, R-EGP-CQDs-NMe<sub>2</sub>, -NEt<sub>2</sub>, and -NPr<sub>2</sub>.

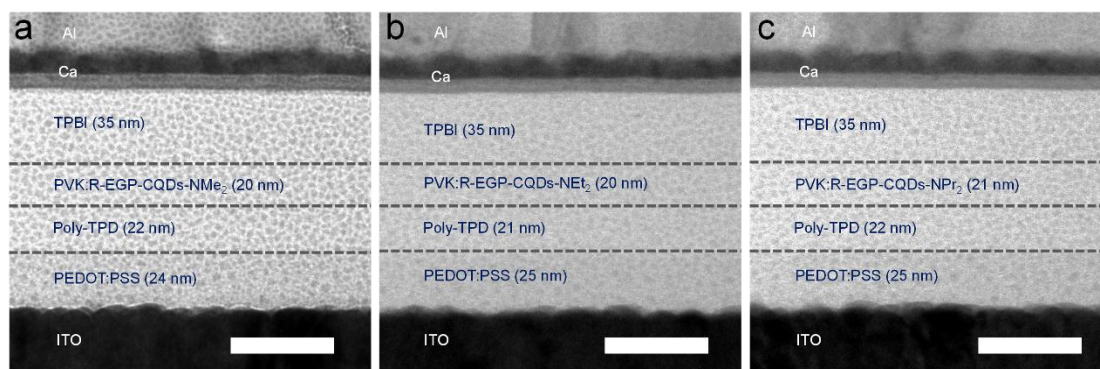

**Figure S13.** The cross-sectional TEM images of WLEDs-1 (a), -2 (b) and -3 (c) based on the ITO/PEDOT:PSS/Poly-TPD/PVK:R-EGP-CQDs (9 wt%)/TPBI/Ca/Al structure. Scale bar: 50 nm.

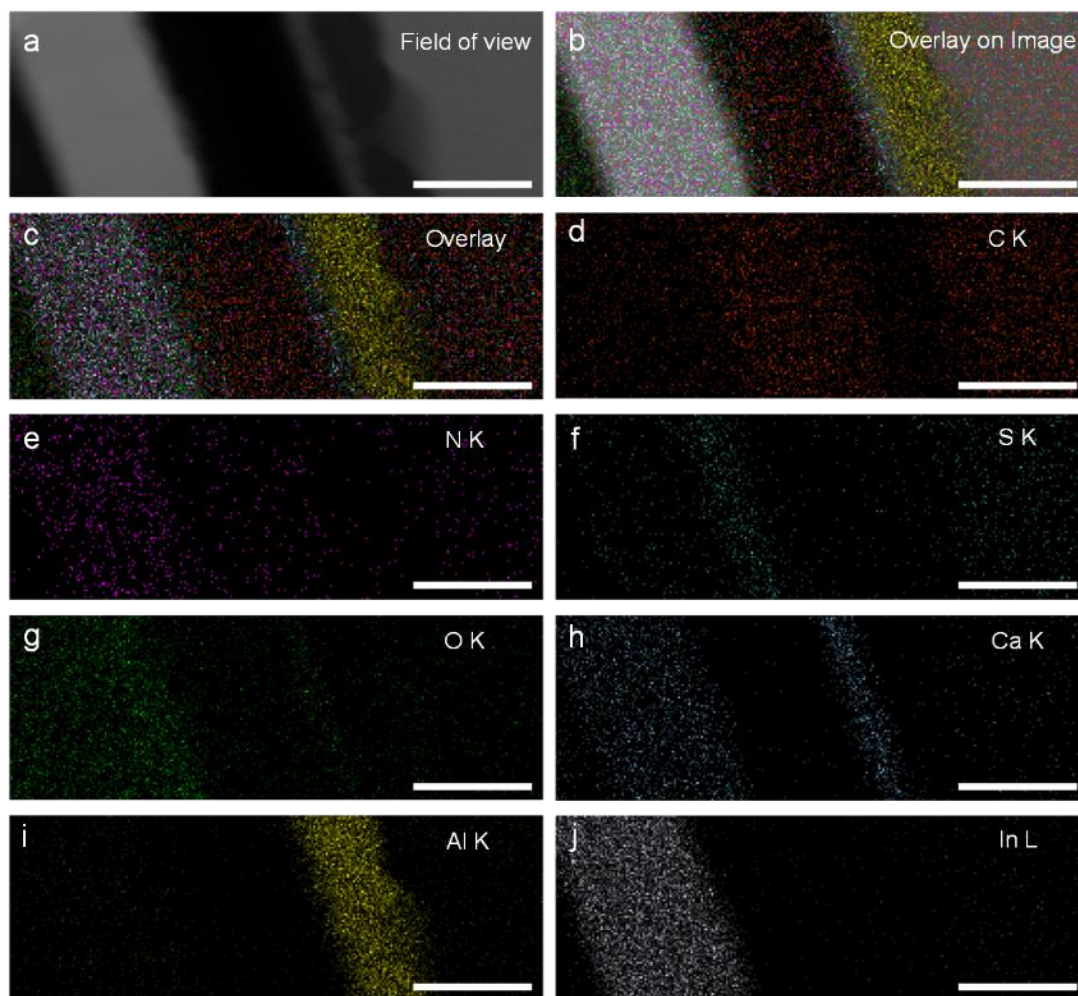

**Figure S14.** The cross-sectional TEM image (a) and corresponding EDX mapping images (b-j) of a typical WLEDs device. Scale bar: 100 nm.

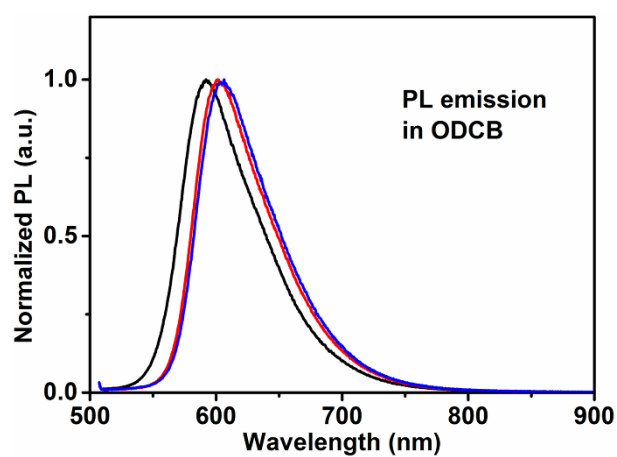

**Figure S15.** Normalized PL emission spectra in ODCB of R-EGP-CQDs-NMe<sub>2</sub> (black), -NEt<sub>2</sub> (red), and -NPr<sub>2</sub> (blue) with 500 nm excitation.

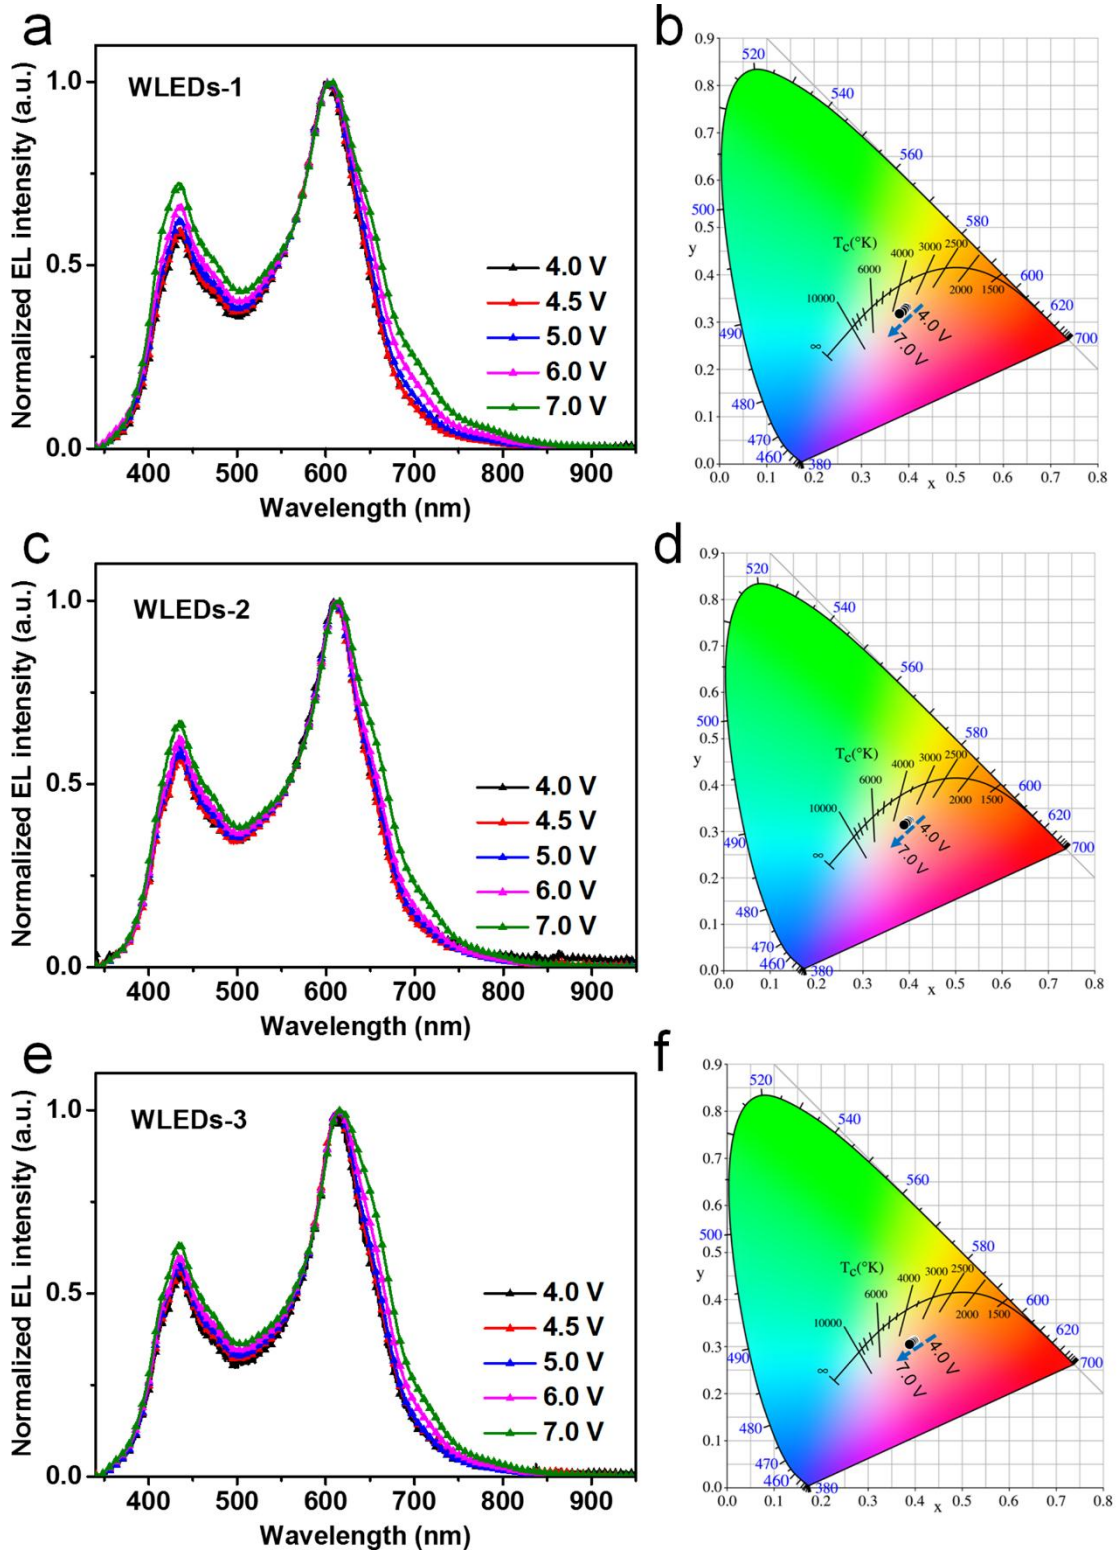

Figure S16. Normalized EL spectra (a, c, e), and corresponding CIE coordinates (b, d, f) of the optimized WLEDs-1, -2, and -3 at different bias voltages.

**Table S11.** Detailed device performances of optimized WLEDs-1, -2, and -3 at different bias voltage.

| LEDs    | EML                                            | Bias Voltage [V] | Luminance [cd/m <sup>2</sup> ] | Current Density [mA/cm <sup>2</sup> ] | Current Efficiency [cd/A] | EL peak [nm] | CIE   |       | CCT [K] |
|---------|------------------------------------------------|------------------|--------------------------------|---------------------------------------|---------------------------|--------------|-------|-------|---------|
|         |                                                |                  |                                |                                       |                           |              | x     | y     |         |
| WLEDs-1 | PVK:<br>R-EGP-CQDs-NMe <sub>2</sub><br>(9 wt%) | 4.0              | 98                             | 7                                     | 1.40                      | 602/435      | 0.398 | 0.330 | 2984    |
|         |                                                | 4.5              | 371                            | 12                                    | 2.96                      | 603/435      | 0.396 | 0.328 | 3031    |
|         |                                                | 5.0              | 933                            | 26                                    | 3.49                      | 604/435      | 0.392 | 0.325 | 3087    |
|         |                                                | 6.0              | 2956                           | 96                                    | 3.06                      | 605/435      | 0.388 | 0.321 | 3170    |
|         |                                                | 7.0              | 5004                           | 251                                   | 1.98                      | 605/434      | 0.379 | 0.314 | 3365    |
| WLEDs-2 | PVK:<br>R-EGP-CQDs-NEt <sub>2</sub><br>(9 wt%) | 4.0              | 148                            | 5                                     | 2.73                      | 610/435      | 0.398 | 0.324 | 2894    |
|         |                                                | 4.5              | 451                            | 13                                    | 3.41                      | 611/435      | 0.397 | 0.323 | 2920    |
|         |                                                | 5.0              | 1083                           | 29                                    | 3.70                      | 611/435      | 0.394 | 0.320 | 2977    |
|         |                                                | 6.0              | 3334                           | 111                                   | 2.99                      | 612/435      | 0.390 | 0.317 | 3048    |
|         |                                                | 7.0              | 5765                           | 314                                   | 1.84                      | 612/435      | 0.383 | 0.311 | 3168    |
| WLEDs-3 | PVK:<br>R-EGP-CQDs-NPr <sub>2</sub><br>(9 wt%) | 4.0              | 200                            | 6.6                                   | 3.03                      | 613/435      | 0.401 | 0.315 | 2665    |
|         |                                                | 4.5              | 601                            | 16                                    | 3.71                      | 613/435      | 0.399 | 0.315 | 2725    |
|         |                                                | 5.0              | 1339                           | 36                                    | 3.71                      | 614/435      | 0.396 | 0.313 | 2789    |
|         |                                                | 6.0              | 3628                           | 132                                   | 2.74                      | 615/435      | 0.393 | 0.313 | 2868    |
|         |                                                | 7.0              | 5875                           | 344                                   | 1.70                      | 616/435      | 0.388 | 0.309 | 2987    |

**Table S12.** Comparison of our CQDs-based warm-WLEDs with other previously reported representative CQDs-based and Colloidal semiconductor QDs-based WLEDs.

| WLEDs                      |                                                                                                           | V <sub>on</sub> [V] | L <sub>max</sub> [cd/m <sup>2</sup> ] | η <sub>e,max</sub> [cd/A] | CIE            | CCT [K]   | Reference                               |
|----------------------------|-----------------------------------------------------------------------------------------------------------|---------------------|---------------------------------------|---------------------------|----------------|-----------|-----------------------------------------|
| Carbon quantum dots (CQDs) | PVK:<br>R-EGP-CQDs<br>-NMe <sub>2</sub> / <sub>2</sub> -NEt <sub>2</sub> / <sub>2</sub> -NPr <sub>2</sub> | 3~3.3               | 5248~5909                             | 3.65~3.85                 | (0.383,0.311)  | 2987~3365 | This work                               |
|                            | PVK:G-CQDs                                                                                                | 3.9                 | 2050                                  | 1.1                       | (0.30, 0.33)   | 7227      | Adv. Mater. 2017, 29, 1604436.          |
|                            | PVK:CDs                                                                                                   | ~8                  | 455.2                                 | -                         | (0.29, 0.33)   | 7694      | Nanoscale, 2018, 10, 11211              |
|                            | WCQDs                                                                                                     | 5                   | 300                                   | -                         | (0.27, 0.29)   | 11010     | Adv. Funct. Mater. 2016, 26, 2739-2744. |
|                            | CDs                                                                                                       | 4.6                 | 90                                    | -                         | -              | -         | ACS nano 2013, 7, 11234-11241.          |
|                            | CQDs                                                                                                      | 5.7                 | 35                                    | 0.022                     | -              | -         | Chem. Commun. 2011, 47, 3502-3504.      |
| Colloidal semiconductor    | mixed RGB Cd <sup>2+</sup> -QD active                                                                     | ~5                  | 23352                                 | 21.8                      | (0.319, 0.336) | 6126~7719 | ACS Nano 2015, 9, 10941-10949.          |

|                    |                                          |     |                                  |     |               |           |                                  |
|--------------------|------------------------------------------|-----|----------------------------------|-----|---------------|-----------|----------------------------------|
| quantum dots (QDs) | layers                                   |     |                                  |     |               |           |                                  |
|                    | mixed Cd <sup>2+</sup> -QD active layers | ~4  | 6400                             | -   | (0.35, 0.39)  | 3900~8000 | Adv. Mater. 2014, 26, 6387-6393. |
|                    | CBP:QDs (B, G, R)                        | 6   | 1050                             | 1.8 | (0.32,0.45)   | 5897      | Adv. Mater. 2006, 18, 2545-2548. |
|                    | CGS/ZnS QDs                              | 5~6 | 924                              | 2.9 | (0.332,0.338) | 4700      | Adv. Mater. 2016, 28, 5093-5098. |
|                    | RBG-QDs                                  | ~5  | 830                              | 0.9 | (0.35, 0.41)  | 5500      | Nano Lett. 2007, 7, 2196-2200.   |
|                    | ZnCuInS/ZnS QDs/poly-TPD                 | 10  | 450                              | -   | (0.336,0.339) | 5310      | Nano Lett. 2011, 11, 329-332.    |
|                    | InP/ZnS /poly-TPD                        | 11  | 270                              | -   | (0.332,0.338) | 5000~6000 | Adv. Mater. 2012, 24, 4180-4185. |
|                    | TPD/CdSe                                 | -   | $4.83 \times 10^{-5}$ lumen/watt | -   | (0.333,0.333) | 5500~6000 | Nano Lett. 2010, 10, 573-576.    |

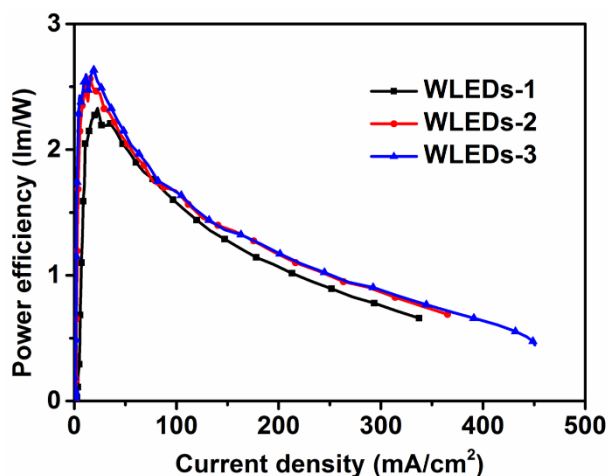

Figure S17. The power efficiency curves of WLEDs-1, -2, and -3.

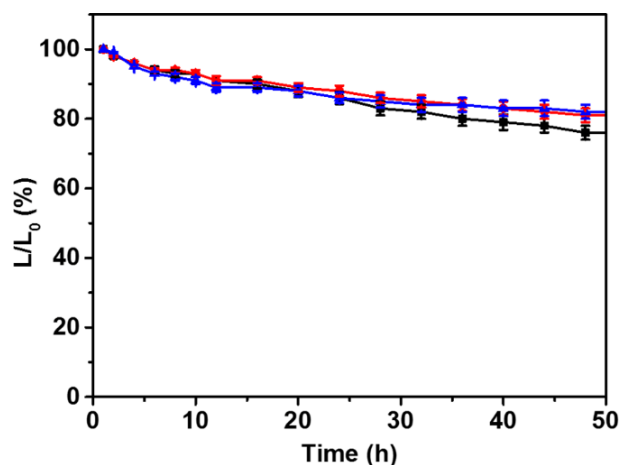

Figure S18. The operation stability plots of WLEDs-1 (black), -2 (red), and -3 (blue).

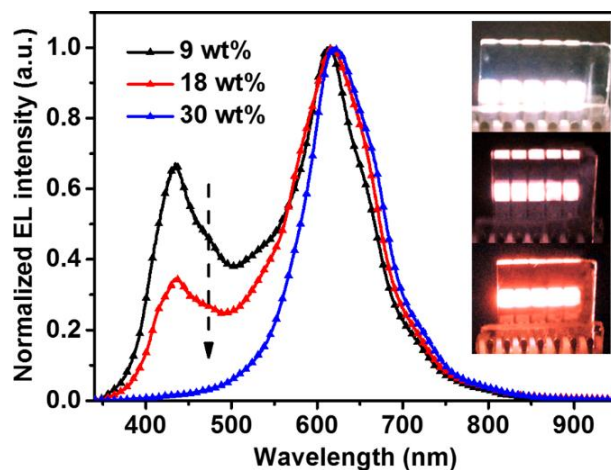

**Figure S19.** EL spectra and operation photographs (from top to bottom) of LEDs at 7 V with 9, 18, and 30 wt% R-EGP-CQDs- $\text{NET}_2$  in PVK as EML, respectively.

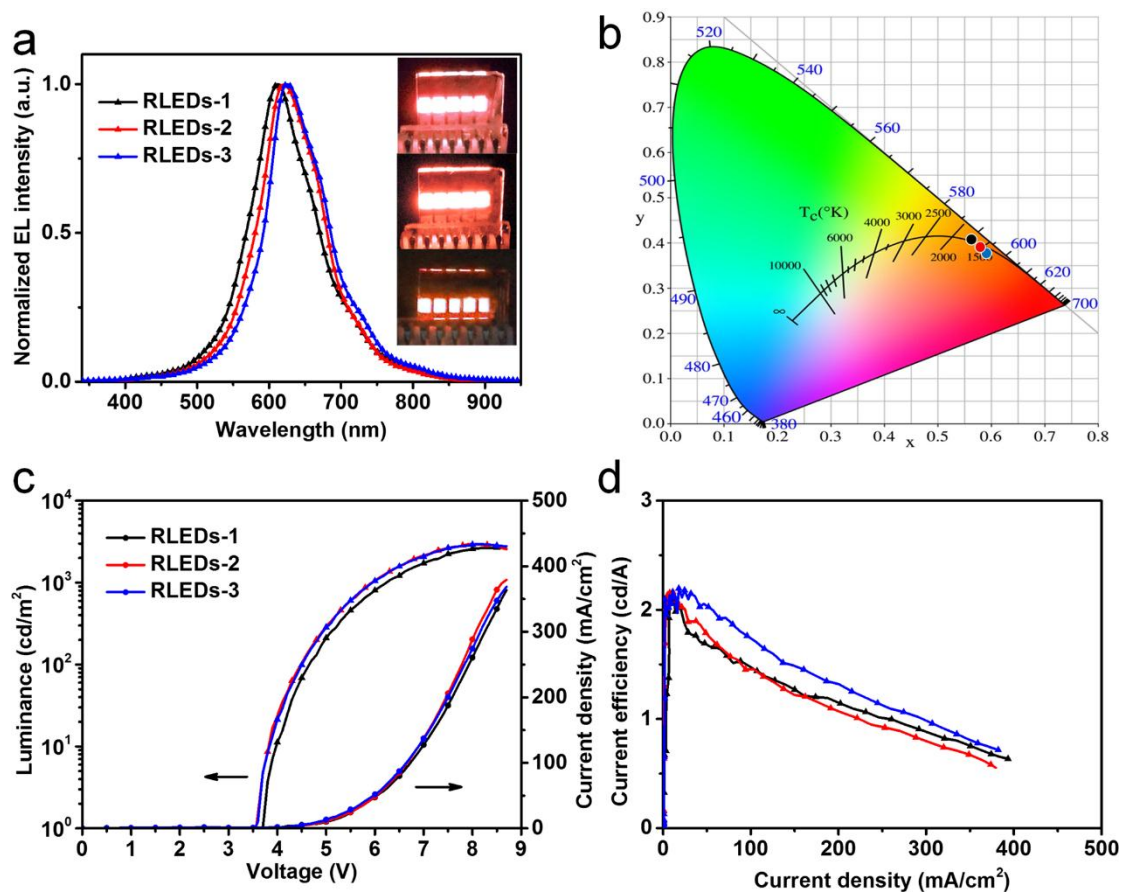

**Figure S20.** EL spectra (a), operation photographs (insets in a, from top to bottom), and corresponding CIE coordinates (b) of RLEDs-1, -2, and -3 under 7.0 V, respectively. The J-V-L (c) and current efficiency (d) of RLEDs-1 (black), -2 (red), and -3 (blue).

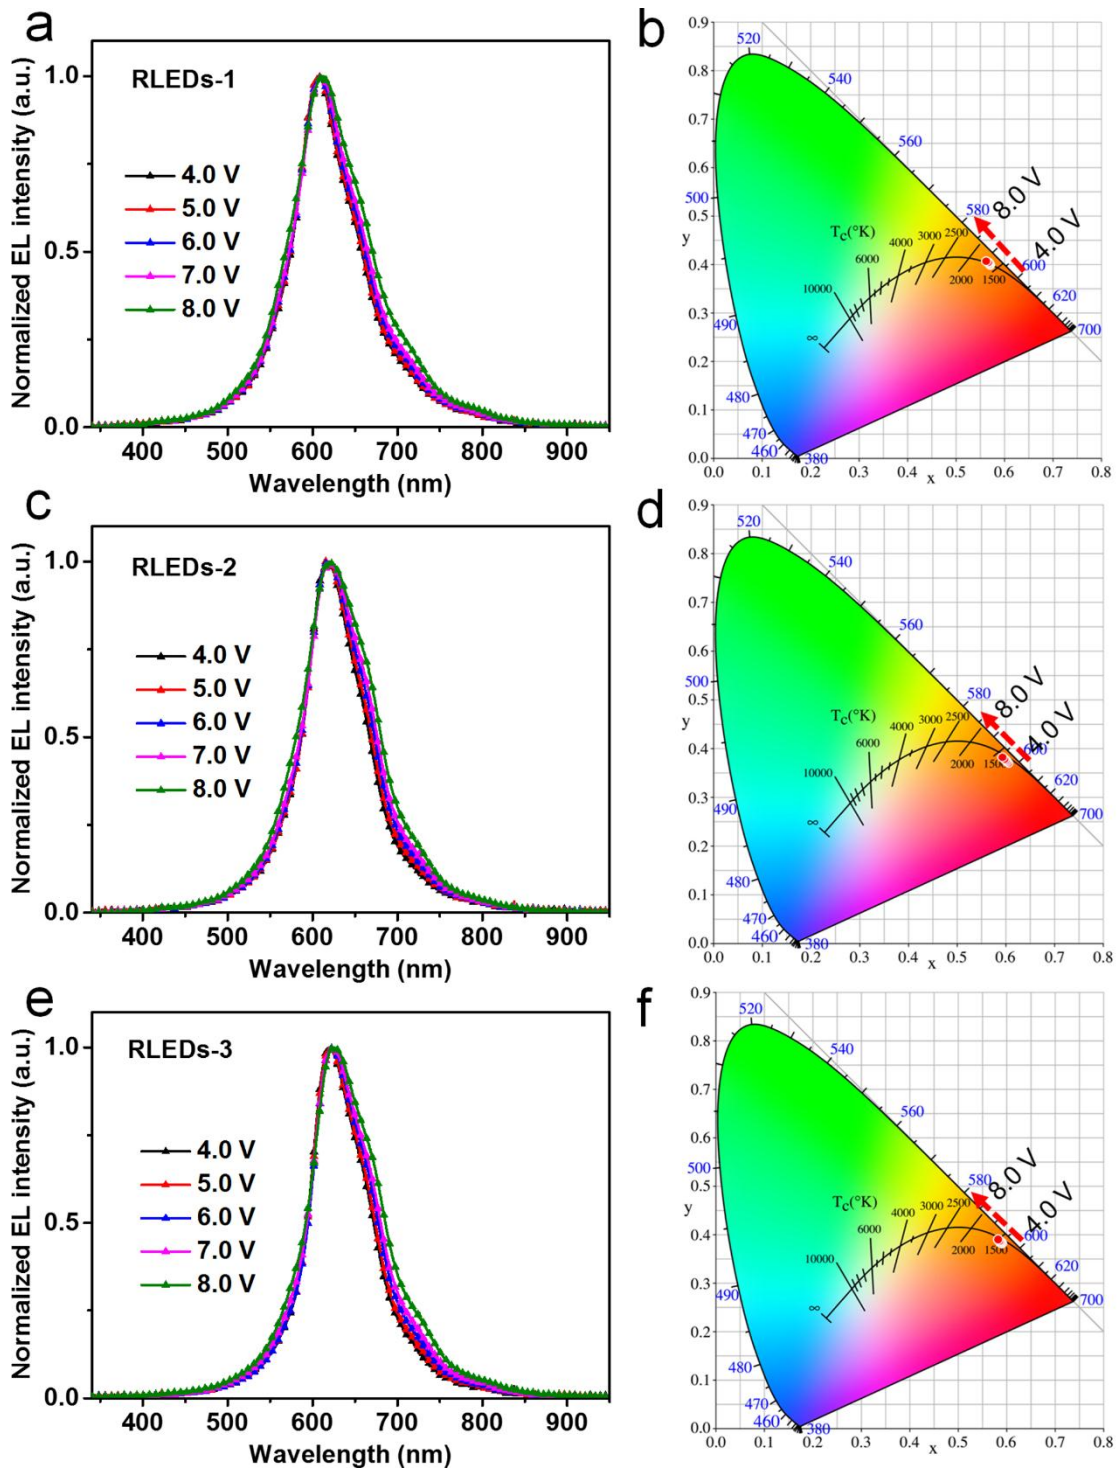

Figure S21. Normalized EL spectra (a, c, e), and corresponding CIE coordinates (b, d, f) of the optimized RLEDs-1, -2, and -3 at different bias voltages.

**Table S13.** Device performances of optimized RLEDs-1, -2, and -3 at different bias voltage.

| LEDs    | EL peak [nm] | V <sub>on</sub> [V] | L <sub>max</sub> [cd/m <sup>2</sup> ] | η <sub>c, max</sub> [cd/A] | CIE [e]        |
|---------|--------------|---------------------|---------------------------------------|----------------------------|----------------|
| RLEDs-1 | 611          | 3.7                 | 2687                                  | 2.11                       | (0.564, 0.404) |
| RLEDs-2 | 621          | 3.6                 | 2933                                  | 2.17                       | (0.581, 0.390) |
| RLEDs-3 | 626          | 3.6                 | 2960                                  | 2.19                       | (0.591, 0.378) |
